# Supplementary material
Source: PubMed Central journal article supplement (PMC8694707)
Supplement: mmc1.pdf [file mmc1.pdf]

# THE LANCET

## Infectious Diseases

### Supplementary appendix 1

This translation in Hindi was submitted by the authors and we reproduce it as supplied. It has not been peer reviewed. *The Lancet's* editorial processes have only been applied to the original in English, which should serve as reference for this manuscript.

Supplement to: Lewnard JA, Mahmud A, Narayan T, et al. All-cause mortality during the COVID-19 pandemic in Chennai, India: an observational study. *Lancet Infect Dis* 2021; published online Dec 22. [https://doi.org/10.1016/S1473-3099\(21\)00746-5](https://doi.org/10.1016/S1473-3099(21)00746-5).

हिंदी में यह अनुवाद लेखकों द्वारा प्रस्तुत किया गया था और हम इसे जैसे उपलब्ध कराया गया वैसे पुनः पेश करते हैं। इस पर सहकर्मी की समीक्षा नहीं की गई है। लैंसेट की संपादकीय प्रक्रियाओं को केवल अंग्रेजी में मूल पर लागू किया गया है, जो इस पांडुलिपि के संदर्भ के रूप में काम आना चाहिए।

## सारांश

**पृष्ठभूमि** वर्तमान में चल रही COVID-19 महामारी से भारत बुरी तरह प्रभावित हुआ है। लेकिन, रोग निगरानी में कमियों के कारण, COVID-19 से जुड़े मृत्यु दर के बोझ अभी भी कम ही समझा जा सकता है। हमने जिले के भीतर सर्व-कारण मृत्यु दर के आंकड़ों का उपयोग करते हुए, चेन्नई, तमिलनाडु में महामारी के दौरान मृत्यु दर में परिवर्तन का आकलन करने का लक्ष्य रखा।

**विधियां** इस अवलोकन अध्ययन के लिए, हमने 1 जनवरी 2016 से 30 जून 2021 तक चेन्नई में हुए व्यापक मृत्यु पंजीकरण का विश्लेषण किया। हमने पूर्व महामारी अवधि के दौरान, उम्र और लिंग द्वारा स्तरीकरण के साथ, मॉडल्स को निरीक्षण किये गए मृत्यु दर समय श्रृंखला के में फिट करके COVID-19 महामारी के प्रभावों के बिना अपेक्षित मृत्यु दर का अनुमान लगाया। इसके अतिरिक्त, हमने रुचि की तीन अवधियों को ध्यान में रखा: भारत के पहले लॉकडाउन के पहले 4 सप्ताह (24 मार्च से 20 अप्रैल, 2020), चेन्नई में महामारी की पहली लहर सहित 4 महीने की अवधि (1 मई से 31 अगस्त, 2020), और चेन्नई में महामारी की दूसरी लहर सहित 4 महीने की अवधि (1 मार्च से 30 जून, 2021)। हमने 1 मार्च, 2020 से 30 जून, 2021 तक देखे गए और अपेक्षित मृत्यु दर के बीच अंतर की गणना की, और प्रतिगमन विश्लेषण वाले सामाजिक आर्थिक रूप से अलग समुदायों (भारत की 2011 की जनगणना डेटा के उपयोग से मापा गया) में महामारी से संबंधित मृत्यु दर की तुलना की।

**परिणाम** 2011 की जनगणना द्वारा दर्शाया गया कि 1 मार्च, 2020 और 30 जून, 2021 के बीच, चेन्नई जिले के क्षेत्रों में 87 870 मौतें दर्ज की गईं, जो अपेक्षित मौतों से 25 990 (95% अनिश्चितता अंतराल 25 640–26 360) या 5.18 (5.11–5.25) प्रति 1000 व्यक्ति से अधिक है। उम्र के आधार पर, 60-69 वर्ष की आयु के व्यक्तियों के लिए अधिक मौतों की संख्या 21.02 (20.54–21.49) प्रति 1000 व्यक्ति, 70-79 वर्ष की आयु वर्ग के लोगों के लिए 39.74 (38.73–40.69), और 80 वर्ष या उससे अधिक आयु वालों के लिए 96.90 (93.35-100.16) है। निम्न सामाजिक-आर्थिक स्थिति वाले आसपड़ोस में वंचित सामुदाय के प्रत्येक माप में महामारी से जुड़ी मृत्यु दर में प्रति 1 एसडी 0.7% से 2.8% की वृद्धि हुई थी, जिसका मुख्य कारण दूसरी लहर के दौरान आसपड़ोस में मृत्यु दर में असमान वृद्धि थी। इसके विपरीत, व्यापक SARS-CoV-2 प्रसार से पहले, समुदायों में अधिक मृत्यु दर में अंतर स्पष्ट रूप से पहली लहर के दौरान सामाजिक आर्थिक स्थिति के मापों से जुड़ा नहीं था। भारत में देशव्यापी तालाबंदी के पहले 4 हफ्तों के दौरान चेन्नई में वंचित सामुदाय के मापों में प्रत्येक 1 एसडी की वृद्धि के लिए आसपड़ोस में महामारी से संबंधित 3.6% से 8.6% तक मृत्यु दर कम थी। इस प्रारंभिक लॉकडाउन अवधि के दौरान मृत्यु दर में सबसे बड़ी कमी 20-29 वर्ष की आयु के पुरुषों में देखी गई, जिसमें पूर्व-महामारी प्रवृत्तियों से 58% (54-62) कम मौतें हुई थीं।

**व्याख्या** COVID-19 महामारी के दौरान चेन्नई में वंचित समुदायों में केंद्रित सबसे बड़ा बोझ के साथ मृत्यु दर में काफी लेकिन विषम रूप से वृद्धि हुई। COVID-19 से होने वाली मौतों की रिपोर्ट की गयी सूचना में महामारी से जुड़ी मृत्यु दर को बहुत कम करके आंका गया है।
