# Supplementary material
Source: PubMed Central journal article supplement (PMC8694707)
Supplement: mmc2.pdf [file mmc2.pdf]

# THE LANCET

## Infectious Diseases

### Supplementary appendix 2

This appendix formed part of the original submission and has been peer reviewed. We post it as supplied by the authors.

Supplement to: Lewnard JA, Mahmud A, Narayan T, et al. All-cause mortality during the COVID-19 pandemic in Chennai, India: an observational study. *Lancet Infect Dis* 2021; published online Dec 22. [https://doi.org/10.1016/S1473-3099\(21\)00746-5](https://doi.org/10.1016/S1473-3099(21)00746-5).

## SUPPORTING INFORMATION

Excess mortality during the COVID-19 pandemic in Chennai, India: an observational study

Joseph A. Lewnard, PhD<sup>1,2,3,\*</sup> Ayesha Mahmud, PhD,<sup>4</sup> Tejas Narayan<sup>5</sup>, Brian Wahl, MPH, PhD<sup>6,7</sup>, T. S. Selvavinayagam, MBBS<sup>8</sup>, Chandra Mohan B., MBBS<sup>8</sup>, Ramanan Laxminarayan, PhD<sup>6,9,10</sup>

1. Division of Epidemiology, School of Public Health, University of California, Berkeley, California, United States
2. Division of Infectious Diseases & Vaccinology, School of Public Health, University of California, Berkeley, California, United States
3. Center for Computational Biology, College of Engineering, University of California, Berkeley, California, United States
4. Department of Demography, University of California, Berkeley, California, United States
5. University of Chicago, Chicago, Illinois, United States
6. Department of International Health, Johns Hopkins Bloomberg School of Public Health, Baltimore, Maryland, United States
7. International Vaccine Access Center, Johns Hopkins Bloomberg School of Public Health, Baltimore, Maryland, United States
8. Government of Tamil Nadu, Chennai, Tamil Nadu, India
9. Center for Disease Dynamics, Economics & Policy, New Delhi, India
10. Princeton University, Princeton, New Jersey, United States

\* Address for correspondence:  
Joseph A. Lewnard  
2121 Berkeley Way, Room 5410  
Berkeley, California 94720  
[jlewnard@berkeley.edu](mailto:jlewnard@berkeley.edu)  
+1 (510) 664-4050

| <b><u>Contents of this supplement</u></b> |                                                                                                                                                      | <b><u>Page</u></b> |
|-------------------------------------------|------------------------------------------------------------------------------------------------------------------------------------------------------|--------------------|
| Text S1                                   | Supplementary methods—Model selection                                                                                                                | 3                  |
| Text S2                                   | Supplementary methods—Analyses of community socioeconomic attributes                                                                                 | 4                  |
| Table S1                                  | Testing, cases, and deaths by district in Tamil Nadu as of 30 June, 2021.                                                                            | 5                  |
| Table S2                                  | Description of socioeconomic indicators included in the analysis.                                                                                    | 6                  |
| Table S3                                  | Expected and observed deaths among males during the COVID-19 pandemic in Chennai.                                                                    | 7                  |
| Table S4                                  | Expected and observed deaths among females during the COVID-19 pandemic in Chennai.                                                                  | 8                  |
| Table S5                                  | All-cause mortality for various age ranges among children and adolescents                                                                            | 9                  |
| Table S6                                  | Measures of fit for alternative model formulations.                                                                                                  | 10                 |
| Table S7                                  | Expected and observed deaths during the COVID-19 pandemic in Chennai, for models without secular reporting changes amid redistricting.               | 11                 |
| Table S8                                  | Expected and observed deaths among males during the COVID-19 pandemic in Chennai, for models without secular reporting changes amid redistricting.   | 12                 |
| Table S9                                  | Expected and observed deaths among females during the COVID-19 pandemic in Chennai, for models without secular reporting changes amid redistricting. | 13                 |
| Table S10                                 | Expected and observed deaths during the COVID-19 pandemic in Chennai, for models fitted to 7-day moving average mortality time series.               | 14                 |
| Table S11                                 | Expected and observed deaths during the COVID-19 pandemic in Chennai, for models fitted to 28-day moving average mortality time series.              | 15                 |
| Table S12                                 | Annualized life tables for males in Chennai, 2019-2021.                                                                                              | 16                 |
| Table S13                                 | Annualized life tables for females in Chennai, 2019-2021.                                                                                            | 18                 |
| Table S14                                 | Mean life years lost among individuals experiencing pandemic-associated mortality in 2020 and 2021, relative to life expectancy in 2019.             | 20                 |
| Table S15                                 | Unadjusted associations of excess mortality with community socioeconomic attributes.                                                                 | 21                 |
| Table S16                                 | Unadjusted associations of excess mortality with community socioeconomic attributes among individuals aged 50 years and older.                       | 22                 |
| Table S17                                 | Principal component analysis of community socioeconomic attributes.                                                                                  | 23                 |
| Table S18                                 | Unadjusted and adjusted associations of excess mortality with principal component variables.                                                         | 24                 |
| Table S19                                 | Unadjusted and adjusted associations of excess mortality with principal component variables among individuals aged 50 years and older.               | 25                 |
| Figure S1                                 | Reported COVID-19 cases and deaths in Chennai                                                                                                        | 26                 |
| Figure S2                                 | Lagged reporting of cases and deaths in the Civil Registration System, 2016-19                                                                       | 27                 |
| Figure S3                                 | Excess mortality during the COVID-19 pandemic in Chennai, for models without secular reporting changes after redistricting.                          | 28                 |
| Figure S4                                 | Age-specific excess mortality during the COVID-19 pandemic in Chennai, for models without secular reporting changes after redistricting.             | 29                 |
| Figure S5                                 | Age-specific excess mortality during the COVID-19 pandemic in Chennai, for models fitted to 7-day moving average time series.                        | 30                 |
| Figure S6                                 | Age-specific excess mortality during the COVID-19 pandemic in Chennai, for models fitted to 28-day moving average time series.                       | 31                 |
| Figure S7                                 | Distribution of observed to expected mortality across PIN code areas.                                                                                | 32                 |
| Figure S8                                 | Relative mortality during the COVID-19 pandemic according to community socioeconomic status decile.                                                  | 33                 |

## Text S1: Supplementary methods—Model selection.

Models took the functional form

$$E[Y_t|X_t] = \exp\left(\beta_0 + \beta_1 t + \beta_2 \sin\left(\frac{2\pi t}{365.25}\right) + \beta_3 \cos\left(\frac{2\pi t}{365.25}\right) + \dots + \log(\text{pop}_t)\right),$$

where  $Y_t$  indicates the outcome variable of the two-week moving average count of deaths at time  $t$  (defined here on a continuous scale),  $\text{pop}_t$  indicates the population at time  $t$ , and sine and cosine transformations were defined for covariates corresponding to 1, 2, 3, and 4 periods per year (or period lengths of 12 months, 6 months, 4 months, and 3 months; the equation above includes a 12-month period, i.e. 365.25 days, for illustration). To correct observed death counts ( $Y_t$ ) for lagged reporting of the most recent data, we divided observed counts for each date by the proportion of deaths expected to be reported by that day, based on the distribution of times from death date to report date during 2019, the last pre-pandemic year (**Figure S2**).

Boundaries of Chennai were redrawn in 2019, enlarging the area and population of the administrative district. To account for this change, and to exclude deaths among residents of other districts (e.g., those who died while receiving healthcare in Chennai), we included in our analyses only decedents who resided in postal index number (PIN) code areas within the pre-2019 district boundaries. We used projections of the district population, by age and sex, within the pre-2019 administrative boundaries based on 2011 Census of India data (available from: <https://www.census.gov/geographies/mapping-files/time-series/demo/international-programs/subnationalpopulation.html>). Because redistricting resulted in an expansion of the district area and population, and merging of administrative functions across previously distinct jurisdictions, we allowed for the possibility that this change affected deaths reporting by fitting regression models which included or did not include a distinct intercept for the period after Chennai's redistricting:

$$E[Y_t|X_t] = \exp\left(\beta_0 + \beta_1 t + \beta_2 \sin\left(\frac{2\pi t}{365.25}\right) + \beta_3 \cos\left(\frac{2\pi t}{365.25}\right) + \dots + \beta_k I[t > t_{\text{Redistrict}}] + \log(\text{pop}_t)\right).$$

We compared within-sample (January, 2016 to February, 2020) and predictive fit (pre-lockdown period of March 1-23, 2020) for models with and without the  $\beta_k$  parameter on the basis of least squares, in addition to comparing values of the Bayesian information criterion (BIC) to include a penalty for overfitting (**Table S6**). Models including the  $\beta_k$  offered superior performance on all metrics (BIC, within-sample fit, and predictive fit), and predictions based on these models were considered our primary estimates. We also generated predictions based on the alternative formulation (i.e., models fit without allowing for the  $\beta_k$  parameter) as a sensitivity analysis, obtaining similar results to those from our primary analyses (**Table S7, Table S8, Table S9, Figure S3, Figure S4**).

## Text S2: Supplementary methods—Analyses of community socioeconomic attributes.

Socioeconomic variables measured at the PIN code level on the basis of Census of India data are listed in **Table S2** and broadly included household density (average persons per household), physical condition of dwelling structures (proportions of households occupying non-permanent dwelling structures; proportion of households occupying dilapidated or unlivable dwelling structures; and proportion of households with unfinished flooring), water and sanitation (proportion of households lacking on-site water or latrines, and proportion of households practicing open defecation), access to improved energy sources (proportion of households lacking electric lighting and proportion of households reliant on solid cooking fuels), indicators of household wealth (proportion of households lacking bank accounts or key assets used as a wealth index), and the proportion of residents belonging to scheduled castes or tribes. All variables were analyzed in their original form without logarithmic or polynomial transformations. We also measured population density as the total population estimated to reside within a 2.5km radius of the postal office corresponding to each PIN code, based on rasterized population estimates at a 0.00833° grid resolution (available from: <https://doi.org/10.7927/gya1-wp91>).

We measured the unadjusted association of each of these measures of community socioeconomic status ( $X$ ) by fitting regression models expressing

$$E \left[ \log \frac{Y_{\text{observed}}}{Y_{\text{predicted}}} \right] = \beta_0 + \beta_1 X.$$

Here,  $Y_{\text{predicted}}$  was estimated for each PIN code according to the negative binomial regression approach described in **Text S1**. Our framework aimed to test the hypothesis that pandemic-associated mortality differed across PIN code areas in association with community socioeconomic status, as measured by each of the 13 distinct socioeconomic variables (**Figure 3, Table S15**). As we did not hypothesize that each measured attribute of communities independently contributed to differences in COVID-19 burden, the objective of our analysis was not to obtain causal inferences based on adjusted associations of each community attribute with mortality outcomes, controlling for all 12 other measures of community socioeconomic status. As a complementary approach to assess associations of pandemic-associated mortality with community socioeconomic status, we used principal component analysis (PCA) to decompose the 13 distinct socioeconomic variables into simpler indices of community socioeconomic status.

From our principal component analysis (**Table S17**), the first two principal components were considered to measure community disadvantage on the basis that they accounted for 80.7% and 12.4% of variance, respectively, across all 13 original indicators, and were directionally correlated with measures we considered to indicate poverty; values of Spearman's correlation parameter ( $\rho$ ) ranged from 0.34–0.97 (with 10/13 variables showing  $\rho > 0.7$ ) for PC1, while for PC2,  $\rho$  was positive for 11/13 variables with values of 0.17–0.61 (we obtained  $\rho = -0.03$  and  $\rho = -0.25$  for the correlation of PC2 with the proportion of households occupying dilapidated structures and population density, respectively). Subsequent principal components were not considered to strongly measure community socioeconomic status, as they individually accounted for <3% of variance across the socioeconomic variables analyzed, and showed directionally inconsistent relationships with these measures.

We estimated adjusted associations of relative mortality with principal component measures of community socioeconomic status (PC1 and PC2), controlling for community attributes represented by the other principal components, according to the regression equation

$$E \left[ \ln \frac{Y_{\text{observed}}}{Y_{\text{predicted}}} \right] = \beta_0 + \beta_1 \text{PC}_1 + \beta_2 \text{PC}_2 + \beta_3 \text{PC}_3 + \dots + \beta_{13} \text{PC}_{13}.$$

To propagate uncertainty in our estimates of association, we constructed parameter distributions across values obtained when fitting models using 2,000 independent draws from the distribution of  $Y_{\text{predicted}}$  for each PIN code area (**Table S18**). We repeated analyses in datasets subset to deaths among individuals aged  $\geq 50$  years, whose deaths were more likely to be attributable to COVID-19 (**Table S16, Table S19**).

**Table S1: Testing, cases, and deaths by district in Tamil Nadu as of 30 June, 2021.**

| District             | Population<br>(est.) | Tests   |                         | Cases diagnosed |                         | Reported COVID-19<br>deaths |                         |
|----------------------|----------------------|---------|-------------------------|-----------------|-------------------------|-----------------------------|-------------------------|
|                      |                      | Total   | Per 1,000<br>population | Total           | Per 1,000<br>population | Total                       | Per 1,000<br>population |
| Ariyalur             | 811,540              | 18285   | 22.5                    | 14861           | 18.3                    | 211                         | 0.3                     |
| Chennai <sup>1</sup> | 4,995,398            | 2667777 | 534.0                   | 532529          | 106.6                   | 8187                        | 1.6                     |
| Coimbatore           | 3,717,522            | 102107  | 27.5                    | 219504          | 59.0                    | 2041                        | 0.5                     |
| Cuddalore            | 2,801,447            | 36434   | 13.0                    | 57944           | 20.7                    | 762                         | 0.3                     |
| Dharmapuri           | 1,619,910            | 163803  | 101.1                   | 24502           | 15.1                    | 208                         | 0.1                     |
| Dindigul             | 2,321,834            | 27800   | 12.0                    | 31615           | 13.6                    | 592                         | 0.3                     |
| Erode                | 2,420,705            | 66240   | 27.4                    | 89632           | 37.0                    | 589                         | 0.2                     |
| Kancheepuram         | 4,298,262            | 37505   | 8.7                     | 70232           | 16.3                    | 1176                        | 0.3                     |
| Kanyakumari          | 2,010,719            | 79600   | 39.6                    | 58969           | 29.3                    | 987                         | 0.5                     |
| Karur                | 1,144,369            | 17190   | 15.0                    | 22029           | 19.2                    | 342                         | 0.3                     |
| Krishnagiri          | 2,020,863            | 14284   | 7.1                     | 39870           | 19.7                    | 303                         | 0.1                     |
| Madurai              | 3,266,226            | 97279   | 29.8                    | 72279           | 22.1                    | 1108                        | 0.3                     |
| Nagapattinam         | 1,737,742            | 20984   | 12.1                    | 17850           | 10.3                    | 266                         | 0.2                     |
| Namakkal             | 1,856,155            | 24758   | 13.3                    | 44657           | 24.1                    | 418                         | 0.2                     |
| Nilgiris             | 790,576              | 45839   | 58.0                    | 28353           | 35.9                    | 164                         | 0.2                     |
| Perambalur           | 607,634              | 7981    | 13.1                    | 11056           | 18.2                    | 198                         | 0.3                     |
| Pudukkottai          | 1,739,777            | 20835   | 12.0                    | 26966           | 15.5                    | 321                         | 0.2                     |
| Ramanathapuram       | 1,455,004            | 23389   | 16.1                    | 19619           | 13.5                    | 333                         | 0.2                     |
| Salem                | 3,743,332            | 79660   | 21.3                    | 87864           | 23.5                    | 1472                        | 0.4                     |
| Sivaganga            | 1,439,580            | 25824   | 17.9                    | 17689           | 12.3                    | 189                         | 0.1                     |
| Thanjavur            | 2,586,418            | 67445   | 26.1                    | 63575           | 24.6                    | 708                         | 0.3                     |
| Theni                | 1,339,385            | 45839   | 34.2                    | 42319           | 31.6                    | 493                         | 0.4                     |
| Thiruvallur          | 4,007,844            | 67948   | 17.0                    | 111025          | 27.7                    | 1705                        | 0.4                     |
| Thiruvarur           | 1,359,139            | 67445   | 49.6                    | 36814           | 27.1                    | 327                         | 0.2                     |
| Thoothukkudi         | 1,881,504            | 49288   | 26.2                    | 54331           | 28.9                    | 378                         | 0.2                     |
| Tiruchirappalli      | 2,926,558            | 92586   | 31.6                    | 69244           | 23.7                    | 910                         | 0.3                     |
| Tirunelveli          | 3,308,134            | 54208   | 16.4                    | 47207           | 14.3                    | 410                         | 0.1                     |
| Tiruppur             | 2,665,069            | 36301   | 13.6                    | 82373           | 30.9                    | 757                         | 0.3                     |
| Tiruvannamalai       | 2,649,825            | 76170   | 28.7                    | 49339           | 18.6                    | 597                         | 0.2                     |
| Vellore              | 4,231,690            | 47936   | 11.3                    | 46919           | 11.1                    | 1047                        | 0.2                     |
| Viluppuram           | 3,718,410            | 52064   | 14.0                    | 42464           | 11.4                    | 330                         | 0.1                     |
| Virudhunagar         | 2,088,029            | 28620   | 13.7                    | 44536           | 21.3                    | 528                         | 0.3                     |

<sup>1</sup>Population projections for 2020-21 based on the 2019 redistricting of Chennai are not yet available.

**Table S2: Description of socioeconomic indicators included in the analysis.**

| Category                       | Indicator                                          | Description                                                                                                                                                                                        | Median (mean); range   |
|--------------------------------|----------------------------------------------------|----------------------------------------------------------------------------------------------------------------------------------------------------------------------------------------------------|------------------------|
| Population density             |                                                    |                                                                                                                                                                                                    |                        |
|                                | Household crowding                                 | Average number of persons per room across all households in the ward                                                                                                                               | 2.0 (2.0); 1.3-3.7     |
|                                | Population density                                 | Population inhabiting each raster cell (at 0.00833° resolution)                                                                                                                                    | 252 (463); 0-65,190    |
| Housing quality                |                                                    |                                                                                                                                                                                                    |                        |
|                                | Non-permanent housing structures                   | Proportion of households occupying makeshift or temporary dwelling structures, %                                                                                                                   | 6.2 (9.1); 1.7-46.9    |
|                                | Dilapidated or unlivable dwelling structures       | Proportion of households occupying dwelling structures not deemed to be in "good" condition (i.e., structures classed as being in dilapidated or unlivable condition), %                           | 17.1 (19.8); 10.5-96.9 |
|                                | Households with unfinished flooring                | Proportion of households occupying dwelling structures with mud or exposed earth flooring, %                                                                                                       | 0.8 (2.0); 0.0-32.3    |
| Water, sanitation, and hygiene |                                                    |                                                                                                                                                                                                    |                        |
|                                | Households lacking on-site water                   | Proportion of households for which the primary source of drinking water is not located on the dwelling premises, %                                                                                 | 24.4 (30.7); 3.4-100.0 |
|                                | Households practicing open defecation              | Proportion of households whose members defecate in the open as a primary                                                                                                                           | 0.6 (8.0); 0.0-87.1    |
|                                | Households lacking on-site latrines                | Proportion of households without a flush toilet or pit latrine for waste disposal located on the dwelling premises, %                                                                              | 5.1 (11.6); 0.1-87.1   |
| Fuel and energy                |                                                    |                                                                                                                                                                                                    |                        |
|                                | Households lacking electric lighting               | Proportion of households without electric lighting in the dwelling premises, %                                                                                                                     | 0.7 (1.5); 0.1-17.7    |
|                                | Households reliant on solid cooking fuels          | Proportion of households using firewood, crop fuel, coal, or other solid fuel sources for cooking, %                                                                                               | 3.5 (6.2); 1.1-71.0    |
| Wealth and marginalization     |                                                    |                                                                                                                                                                                                    |                        |
|                                | Population belonging to scheduled castes or tribes | Proportion of individuals belonging to groups recognized by the 1976 Scheduled Castes and Scheduled Tribes Orders (Amendment) Act, %                                                               | 13.3 (16.2); 1.7-51.5  |
|                                | Households lacking bank accounts                   | Proportion of households not availing of banking services, %                                                                                                                                       | 23.1 (27.5); 4.1-75.0  |
|                                | Households lacking key index assets                | Proportion of households lacking all of the following assets: a computer (with or without internet connection), phone (mobile or landline), bicycle, scooter/motorcycle/moped, and car/jeep/van, % | 0.8 (1.3); 0.1-11.3    |

Associations of each community characteristic with excess mortality during various stages of the pandemic are presented in **Figure 3**, **Table S15**, and **Table S16**. Median, mean, and range for the population density variable summarize all raster cells country-wide.

**Table S3: Expected and observed deaths among males during the COVID-19 pandemic in Chennai.**

| Period                                        | Age group       | Expected deaths (95% UI)       | Observed deaths | Excess deaths (95% UI)         | Excess mortality ratio (95% UI) | Excess mortality per 1000 (95% UI) |
|-----------------------------------------------|-----------------|--------------------------------|-----------------|--------------------------------|---------------------------------|------------------------------------|
| March, 2020 to June, 2021                     | 0-9 years       | 520 (500, 540)                 | 354             | -170 (-190, -150)              | 0.68 (0.65, 0.70)               | -0.54 (-0.61, -0.48)               |
|                                               | 10-19 years     | 480 (460, 500)                 | 321             | -160 (-180, -140)              | 0.67 (0.64, 0.69)               | -0.50 (-0.56, -0.44)               |
|                                               | 20-29 years     | 1,180 (1,150, 1,210)           | 1012            | -170 (-200, -140)              | 0.86 (0.84, 0.88)               | -0.37 (-0.43, -0.30)               |
|                                               | 30-39 years     | 2,120 (2,080, 2,160)           | 2,345           | 220 (180, 260)                 | 1.10 (1.08, 1.13)               | 0.48 (0.39, 0.57)                  |
|                                               | 40-49 years     | 3,930 (3,860, 4,000)           | 4,958           | 1,030 (960, 1,100)             | 1.26 (1.24, 1.29)               | 2.55 (2.38, 2.73)                  |
|                                               | 50-59 years     | 6,040 (5,930, 6,130)           | 8,411           | 2,370 (2,280, 2,480)           | 1.39 (1.37, 1.42)               | 7.45 (7.16, 7.78)                  |
|                                               | 60-69 years     | 7,440 (7,320, 7,570)           | 11,605          | 4,170 (4,040, 4,290)           | 1.56 (1.53, 1.59)               | 25.08 (24.30, 25.81)               |
|                                               | 70-79 years     | 7,250 (7,130, 7,380)           | 11,702          | 4,450 (4,320, 4,570)           | 1.61 (1.59, 1.64)               | 51.13 (49.66, 52.54)               |
|                                               | ≥80 years       | 6,330 (6,220, 6,440)           | 9,694           | 3,360 (3,250, 3,480)           | 1.53 (1.50, 1.56)               | 154.28 (149.08, 159.52)            |
|                                               | <b>All ages</b> | <b>35,290 (35,050, 35,530)</b> | <b>50,402</b>   | <b>15,460 (15,210, 15,700)</b> | <b>1.44 (1.43, 1.45)</b>        | <b>6.07 (5.98, 6.17)</b>           |
| Initial lockdown (24 March to 20 April, 2020) | 0-9 years       | 27 (23, 31)                    | 22              | -5 (-10, -1)                   | 0.82 (0.70, 0.96)               | -0.02 (-0.03, 0.00)                |
|                                               | 10-19 years     | 25 (22, 29)                    | 15              | -10 (-14, -7)                  | 0.60 (0.51, 0.69)               | -0.03 (-0.04, -0.02)               |
|                                               | 20-29 years     | 65 (58, 72)                    | 27              | -38 (-45, -31)                 | 0.42 (0.38, 0.46)               | -0.08 (-0.10, -0.07)               |
|                                               | 30-39 years     | 114 (106, 123)                 | 79              | -35 (-44, -26)                 | 0.69 (0.64, 0.75)               | -0.08 (-0.09, -0.06)               |
|                                               | 40-49 years     | 210 (200, 230)                 | 175             | -40 (-50, -20)                 | 0.82 (0.76, 0.88)               | -0.10 (-0.14, -0.06)               |
|                                               | 50-59 years     | 320 (300, 350)                 | 283             | -40 (-60, -20)                 | 0.88 (0.82, 0.94)               | -0.12 (-0.20, -0.06)               |
|                                               | 60-69 years     | 380 (360, 410)                 | 390             | 10 (-20, 30)                   | 1.02 (0.96, 1.09)               | 0.05 (-0.11, 0.21)                 |
|                                               | 70-79 years     | 380 (350, 410)                 | 387             | 10 (-20, 40)                   | 1.03 (0.95, 1.10)               | 0.12 (-0.21, 0.41)                 |
|                                               | ≥80 years       | 330 (310, 360)                 | 384             | 50 (30, 80)                    | 1.17 (1.08, 1.26)               | 2.56 (1.36, 3.71)                  |
|                                               | <b>All ages</b> | <b>1,860 (1,800, 1,910)</b>    | <b>1,762</b>    | <b>-80 (-140, -30)</b>         | <b>0.95 (0.93, 0.98)</b>        | <b>-0.03 (-0.05, -0.01)</b>        |
| Wave 1 (May to August, 2020)                  | 0-9 years       | 120 (110, 130)                 | 77              | -45 (-55, -36)                 | 0.63 (0.59, 0.68)               | -0.14 (-0.18, -0.12)               |
|                                               | 10-19 years     | 115 (106, 124)                 | 62              | -50 (-60, -40)                 | 0.54 (0.50, 0.59)               | -0.16 (-0.19, -0.14)               |
|                                               | 20-29 years     | 290 (280, 310)                 | 218             | -70 (-90, -60)                 | 0.75 (0.71, 0.78)               | -0.16 (-0.19, -0.13)               |
|                                               | 30-39 years     | 510 (490, 530)                 | 486             | -20 (-40, 0)                   | 0.95 (0.92, 0.99)               | -0.05 (-0.09, -0.01)               |
|                                               | 40-49 years     | 910 (880, 940)                 | 1,001           | 100 (60, 130)                  | 1.10 (1.07, 1.14)               | 0.24 (0.16, 0.31)                  |
|                                               | 50-59 years     | 1,370 (1,330, 1,410)           | 1,889           | 520 (480, 560)                 | 1.38 (1.34, 1.42)               | 1.65 (1.51, 1.79)                  |
|                                               | 60-69 years     | 1,670 (1,620, 1,730)           | 2,516           | 840 (790, 890)                 | 1.50 (1.46, 1.55)               | 5.13 (4.80, 5.43)                  |
|                                               | 70-79 years     | 1,650 (1,590, 1,700)           | 2,723           | 1,080 (1,020, 1,140)           | 1.65 (1.60, 1.72)               | 12.54 (11.90, 13.23)               |
|                                               | ≥80 years       | 1,380 (1,320, 1,430)           | 2,153           | 780 (720, 830)                 | 1.56 (1.51, 1.63)               | 36.26 (33.80, 38.72)               |
|                                               | <b>All ages</b> | <b>8,010 (7,900, 8,130)</b>    | <b>11,125</b>   | <b>3,180 (3,070, 3,290)</b>    | <b>1.40 (1.38, 1.42)</b>        | <b>1.26 (1.21, 1.30)</b>           |
| Wave 2 (March to June, 2021)                  | 0-9 years       | 120 (110, 130)                 | 74              | -40 (-50, -30)                 | 0.63 (0.58, 0.68)               | -0.14 (-0.17, -0.11)               |
|                                               | 10-19 years     | 120 (110, 130)                 | 90              | -27 (-35, -18)                 | 0.77 (0.72, 0.83)               | -0.08 (-0.11, -0.06)               |
|                                               | 20-29 years     | 290 (270, 300)                 | 277             | -10 (-20, 0)                   | 0.96 (0.92, 1.01)               | -0.02 (-0.05, 0.01)                |
|                                               | 30-39 years     | 500 (490, 520)                 | 874             | 370 (350, 390)                 | 1.73 (1.67, 1.80)               | 0.79 (0.75, 0.83)                  |
|                                               | 40-49 years     | 920 (890, 960)                 | 1,863           | 940 (910, 980)                 | 2.02 (1.95, 2.10)               | 2.32 (2.24, 2.41)                  |
|                                               | 50-59 years     | 1,410 (1,360, 1,460)           | 3,066           | 1,660 (1,610, 1,700)           | 2.17 (2.11, 2.25)               | 5.14 (4.99, 5.28)                  |
|                                               | 60-69 years     | 1,720 (1,670, 1,780)           | 4,322           | 2,600 (2,550, 2,660)           | 2.52 (2.43, 2.59)               | 15.47 (15.12, 15.79)               |
|                                               | 70-79 years     | 1,690 (1,630, 1,750)           | 4,283           | 2,590 (2,530, 2,650)           | 2.53 (2.44, 2.62)               | 29.38 (28.67, 30.03)               |
|                                               | ≥80 years       | 1,460 (1,410, 1,520)           | 3,418           | 1,950 (1,900, 2,010)           | 2.34 (2.25, 2.43)               | 87.99 (85.56, 90.43)               |
|                                               | <b>All ages</b> | <b>8,230 (8,120, 8,360)</b>    | <b>18,267</b>   | <b>10,180 (10,050, 10,300)</b> | <b>2.24 (2.20, 2.27)</b>        | <b>3.98 (3.93, 4.03)</b>           |

UI: uncertainty interval, generated based on parameter uncertainty and stochastic variability in model-based predicted death counts. Estimates based on an alternative model formulation are presented in Table S7.



**Table S4: Expected and observed deaths among females during the COVID-19 pandemic in Chennai.**

| Period                                        | Age group       | Expected deaths (95% UI)       | Observed deaths | Excess deaths (95% UI)         | Excess mortality ratio (95% UI) | Excess mortality per 1000 (95% UI) |
|-----------------------------------------------|-----------------|--------------------------------|-----------------|--------------------------------|---------------------------------|------------------------------------|
| March, 2020 to June, 2021                     | 0-9 years       | 460 (440, 480)                 | 314             | -140 (-160, -120)              | 0.69 (0.66, 0.72)               | -0.51 (-0.57, -0.44)               |
|                                               | 10-19 years     | 430 (390, 470)                 | 257             | -170 (-210, -130)              | 0.60 (0.55, 0.67)               | -0.56 (-0.70, -0.43)               |
|                                               | 20-29 years     | 540 (520, 560)                 | 517             | -20 (-40, 0)                   | 0.96 (0.93, 1.00)               | -0.05 (-0.08, -0.01)               |
|                                               | 30-39 years     | 810 (790, 830)                 | 944             | 140 (110, 160)                 | 1.17 (1.14, 1.20)               | 0.31 (0.26, 0.37)                  |
|                                               | 40-49 years     | 1,630 (1,590, 1,660)           | 2,388           | 760 (730, 800)                 | 1.47 (1.44, 1.50)               | 1.95 (1.86, 2.04)                  |
|                                               | 50-59 years     | 3,280 (3,220, 3,340)           | 5,061           | 1,780 (1,730, 1,840)           | 1.54 (1.52, 1.57)               | 5.79 (5.60, 5.96)                  |
|                                               | 60-69 years     | 5,520 (5,420, 5,620)           | 8,424           | 2,910 (2,800, 3,010)           | 1.53 (1.50, 1.56)               | 17.05 (16.43, 17.62)               |
|                                               | 70-79 years     | 6,920 (6,790, 7,040)           | 9,986           | 3,070 (2,940, 3,200)           | 1.44 (1.42, 1.47)               | 30.03 (28.81, 31.31)               |
|                                               | ≥80 years       | 7,830 (7,670, 7,970)           | 9,799           | 1,970 (1,820, 2,130)           | 1.25 (1.23, 1.28)               | 59.16 (54.67, 63.88)               |
|                                               | <b>All ages</b> | <b>27,390 (27,160, 27,630)</b> | <b>37,690</b>   | <b>10,530 (10,280, 10,750)</b> | <b>1.38 (1.37, 1.40)</b>        | <b>4.26 (4.16, 4.35)</b>           |
| Initial lockdown (24 March to 20 April, 2020) | 0-9 years       | 27 (22, 32)                    | 18              | -9 (-14, -4)                   | 0.68 (0.57, 0.81)               | -0.03 (-0.05, -0.01)               |
|                                               | 10-19 years     | 15 (10, 23)                    | 10              | -5 (-13, 0)                    | 0.65 (0.44, 0.97)               | -0.02 (-0.04, 0.00)                |
|                                               | 20-29 years     | 32 (28, 37)                    | 18              | -14 (-19, -10)                 | 0.56 (0.49, 0.64)               | -0.03 (-0.04, -0.02)               |
|                                               | 30-39 years     | 40 (35, 45)                    | 52              | 12 (7, 17)                     | 1.31 (1.16, 1.47)               | 0.03 (0.02, 0.04)                  |
|                                               | 40-49 years     | 90 (80, 100)                   | 89              | 2 (-7, 9)                      | 1.02 (0.93, 1.11)               | 0.00 (-0.02, 0.02)                 |
|                                               | 50-59 years     | 170 (160, 190)                 | 179             | 5 (-7, 17)                     | 1.03 (0.96, 1.10)               | 0.02 (-0.02, 0.05)                 |
|                                               | 60-69 years     | 280 (260, 310)                 | 295             | 10 (-10, 30)                   | 1.04 (0.97, 1.12)               | 0.07 (-0.06, 0.19)                 |
|                                               | 70-79 years     | 380 (350, 410)                 | 380             | 0 (-20, 30)                    | 1.01 (0.94, 1.09)               | 0.03 (-0.24, 0.30)                 |
|                                               | ≥80 years       | 400 (370, 430)                 | 440             | 40 (10, 70)                    | 1.11 (1.02, 1.20)               | 1.30 (0.31, 2.20)                  |
|                                               | <b>All ages</b> | <b>1,440 (1,390, 1,490)</b>    | <b>1,481</b>    | <b>60 (10, 110)</b>            | <b>1.04 (1.01, 1.08)</b>        | <b>0.02 (0.00, 0.04)</b>           |
| Wave 1 (May to August, 2020)                  | 0-9 years       | 100 (90, 110)                  | 80              | -20 (-30, -10)                 | 0.82 (0.76, 0.89)               | -0.06 (-0.09, -0.03)               |
|                                               | 10-19 years     | 100 (90, 130)                  | 59              | -40 (-70, -30)                 | 0.58 (0.47, 0.70)               | -0.14 (-0.22, -0.09)               |
|                                               | 20-29 years     | 120 (110, 130)                 | 129             | 5 (-3, 13)                     | 1.04 (0.98, 1.11)               | 0.01 (-0.01, 0.03)                 |
|                                               | 30-39 years     | 190 (180, 200)                 | 196             | 11 (0, 21)                     | 1.06 (1.00, 1.12)               | 0.02 (0.00, 0.05)                  |
|                                               | 40-49 years     | 380 (370, 400)                 | 519             | 140 (120, 150)                 | 1.35 (1.30, 1.41)               | 0.35 (0.31, 0.39)                  |
|                                               | 50-59 years     | 780 (750, 800)                 | 1,117           | 340 (320, 370)                 | 1.44 (1.40, 1.49)               | 1.12 (1.04, 1.21)                  |
|                                               | 60-69 years     | 1,270 (1,230, 1,310)           | 1,884           | 620 (570, 660)                 | 1.49 (1.43, 1.54)               | 3.66 (3.39, 3.91)                  |
|                                               | 70-79 years     | 1,570 (1,510, 1,620)           | 2,300           | 730 (680, 790)                 | 1.47 (1.42, 1.52)               | 7.29 (6.75, 7.86)                  |
|                                               | ≥80 years       | 1,780 (1,710, 1,850)           | 2,196           | 420 (350, 490)                 | 1.24 (1.19, 1.28)               | 12.81 (10.70, 14.85)               |
|                                               | <b>All ages</b> | <b>6,280 (6,170, 6,380)</b>    | <b>8,480</b>    | <b>2,240 (2,140, 2,350)</b>    | <b>1.36 (1.34, 1.38)</b>        | <b>0.91 (0.87, 0.96)</b>           |
| Wave 2 (March to June, 2021)                  | 0-9 years       | 103 (95, 112)                  | 65              | -40 (-50, -30)                 | 0.63 (0.58, 0.68)               | -0.14 (-0.17, -0.11)               |
|                                               | 10-19 years     | 100 (80, 120)                  | 68              | -30 (-50, -10)                 | 0.72 (0.59, 0.85)               | -0.09 (-0.16, -0.04)               |
|                                               | 20-29 years     | 130 (120, 140)                 | 152             | 20 (10, 30)                    | 1.18 (1.10, 1.26)               | 0.05 (0.03, 0.07)                  |
|                                               | 30-39 years     | 190 (180, 200)                 | 356             | 170 (160, 180)                 | 1.92 (1.82, 2.03)               | 0.39 (0.37, 0.42)                  |
|                                               | 40-49 years     | 390 (370, 410)                 | 929             | 540 (520, 550)                 | 2.38 (2.28, 2.48)               | 1.37 (1.33, 1.41)                  |
|                                               | 50-59 years     | 800 (770, 820)                 | 2107            | 1,310 (1,280, 1,340)           | 2.65 (2.56, 2.74)               | 4.20 (4.11, 4.29)                  |
|                                               | 60-69 years     | 1,320 (1,270, 1,360)           | 3324            | 2,010 (1,960, 2,050)           | 2.52 (2.44, 2.61)               | 11.60 (11.34, 11.86)               |
|                                               | 70-79 years     | 1,680 (1,630, 1,740)           | 3662            | 1,980 (1,920, 2,040)           | 2.18 (2.11, 2.25)               | 19.12 (18.58, 19.67)               |
|                                               | ≥80 years       | 1,890 (1,820, 1,960)           | 3346            | 1,460 (1,380, 1,530)           | 1.77 (1.70, 1.84)               | 42.84 (40.62, 44.89)               |
|                                               | <b>All ages</b> | <b>6,590 (6,480, 6,710)</b>    | <b>14,009</b>   | <b>7,510 (7,390, 7,620)</b>    | <b>2.14 (2.10, 2.18)</b>        | <b>3.02 (2.97, 3.07)</b>           |

UI: uncertainty interval, generated based on parameter uncertainty and stochastic variability in model-based predicted death counts. Estimates based on an alternative model formulation are presented in **Table S8**.

**Table S5: All-cause mortality for various age ranges among children and adolescents.**

| Age (years) | Calendar period in reference year (2019) and pandemic years (2020, 2021) |      |      |               |      |                                    |      |                        |      |                        |      |
|-------------|--------------------------------------------------------------------------|------|------|---------------|------|------------------------------------|------|------------------------|------|------------------------|------|
|             | January-June                                                             |      |      | July-December |      | Early lockdown (24 March-20 April) |      | Wave 1 (May to August) |      | Wave 2 (March to June) |      |
|             | 2019 (ref.)                                                              | 2020 | 2021 | 2019 (ref.)   | 2020 | 2019 (ref.)                        | 2020 | 2019 (ref.)            | 2020 | 2019 (ref.)            | 2021 |
| 0-1         | 64                                                                       | 81   | 52   | 108           | 73   | 6                                  | 15   | 55                     | 42   | 43                     | 35   |
| 2-4         | 114                                                                      | 107  | 106  | 163           | 116  | 23                                 | 15   | 79                     | 69   | 70                     | 65   |
| 5-9         | 105                                                                      | 57   | 66   | 124           | 100  | 8                                  | 10   | 68                     | 46   | 65                     | 38   |
| 10-14       | 95                                                                       | 54   | 91   | 98            | 72   | 12                                 | 7    | 57                     | 37   | 57                     | 57   |
| 15-19       | 178                                                                      | 113  | 153  | 161           | 171  | 32                                 | 18   | 105                    | 84   | 116                    | 101  |

Data in the table convey total deaths over each respective period for a reference year (2019) and the subsequent pandemic years (2020 and 2021, as applicable); numbers within these subgroups were too sparse for regression analyses of age-stratified time series.

**Table S6: Measures of fit for alternative model formulations.**

| Model formulation                                         | BIC      | Mean squared error in predictions                            |                                                          |
|-----------------------------------------------------------|----------|--------------------------------------------------------------|----------------------------------------------------------|
|                                                           |          | Within-sample period<br>(January, 2016 to February,<br>2020) | Out-of-sample, pre-lockdown period<br>(March 1-22, 2020) |
| Without accounting for secular change after redistricting | 14,037.5 | 420.2                                                        | 34.7                                                     |
| Accounting for secular change after redistricting         | 13,989.8 | 402.5                                                        | 22.2                                                     |

Alternative model formulations are described in **Text S1**.

**Table S7: Expected and observed deaths during the COVID-19 pandemic in Chennai, for models without secular reporting changes amid redistricting.**

| Period                                        | Age group       | Expected deaths (95% UI)       | Observed deaths | Excess deaths (95% UI)         | Excess mortality ratio (95% UI) | Excess mortality per 1000 (95% UI) |
|-----------------------------------------------|-----------------|--------------------------------|-----------------|--------------------------------|---------------------------------|------------------------------------|
| March, 2020 to June, 2021                     | 0-9 years       | 950 (930, 980)                 | 668             | -290 (-310, -260)              | 0.70 (0.68, 0.72)               | -0.48 (-0.53, -0.44)               |
|                                               | 10-19 years     | 940 (900, 990)                 | 579             | -360 (-410, -320)              | 0.61 (0.58, 0.65)               | -0.59 (-0.67, -0.51)               |
|                                               | 20-29 years     | 1,690 (1,660, 1,720)           | 1,530           | -160 (-190, -130)              | 0.91 (0.89, 0.92)               | -0.18 (-0.21, -0.14)               |
|                                               | 30-39 years     | 2,950 (2,900, 3,000)           | 3,291           | 340 (300, 390)                 | 1.12 (1.10, 1.14)               | 0.38 (0.33, 0.44)                  |
|                                               | 40-49 years     | 5,690 (5,600, 5,760)           | 7,350           | 1,660 (1,590, 1,750)           | 1.29 (1.28, 1.31)               | 2.10 (2.00, 2.21)                  |
|                                               | 50-59 years     | 9,860 (9,730, 9,970)           | 13,475          | 3,620 (3,500, 3,740)           | 1.37 (1.35, 1.38)               | 5.78 (5.59, 5.97)                  |
|                                               | 60-69 years     | 13,900 (13,730, 14,090)        | 20,033          | 6,130 (5,940, 6,300)           | 1.44 (1.42, 1.46)               | 18.21 (17.65, 18.72)               |
|                                               | 70-79 years     | 15,620 (15,420, 15,840)        | 21,687          | 6,060 (5,850, 6,270)           | 1.39 (1.37, 1.41)               | 32.06 (30.93, 33.12)               |
|                                               | ≥80 years       | 15,130 (14,930, 15,330)        | 19,494          | 4,360 (4,170, 4,560)           | 1.29 (1.27, 1.31)               | 79.08 (75.51, 82.73)               |
|                                               | <b>All ages</b> | <b>66,720 (66,330, 67,140)</b> | <b>88,107</b>   | <b>21,950 (21,540, 22,340)</b> | <b>1.33 (1.32, 1.34)</b>        | <b>4.37 (4.29, 4.45)</b>           |
| Initial lockdown (24 March to 20 April, 2020) | 0-9 years       | 53 (47, 59)                    | 40              | -13 (-19, -7)                  | 0.76 (0.68, 0.85)               | -0.02 (-0.03, -0.01)               |
|                                               | 10-19 years     | 42 (36, 50)                    | 25              | -20 (-30, -10)                 | 0.60 (0.50, 0.70)               | -0.03 (-0.04, -0.02)               |
|                                               | 20-29 years     | 96 (88, 103)                   | 45              | -50 (-60, -40)                 | 0.47 (0.44, 0.51)               | -0.06 (-0.07, -0.05)               |
|                                               | 30-39 years     | 160 (150, 170)                 | 131             | -20 (-40, -10)                 | 0.84 (0.79, 0.90)               | -0.03 (-0.04, -0.02)               |
|                                               | 40-49 years     | 310 (290, 330)                 | 264             | -40 (-60 -30)                  | 0.86 (0.81, 0.91)               | -0.06 (-0.08, -0.03)               |
|                                               | 50-59 years     | 520 (490, 550)                 | 462             | -60 (-80, -30)                 | 0.89 (0.85, 0.94)               | -0.09 (-0.14, -0.05)               |
|                                               | 60-69 years     | 710 (670, 740)                 | 685             | -20 (-60, 10)                  | 0.97 (0.92, 1.02)               | -0.06 (-0.17, 0.04)                |
|                                               | 70-79 years     | 810 (770, 860)                 | 767             | -50 (-90, 0)                   | 0.94 (0.89, 1.00)               | -0.24 (-0.49, -0.02)               |
|                                               | ≥80 years       | 770 (730, 810)                 | 824             | 60 (10, 100)                   | 1.07 (1.02, 1.14)               | 1.02 (0.26, 1.83)                  |
|                                               | <b>All ages</b> | <b>3,460 (3,380, 3,540)</b>    | <b>3,243</b>    | <b>-190 (-280, -110)</b>       | <b>0.94 (0.92, 0.97)</b>        | <b>-0.04 (-0.06, -0.03)</b>        |
| Wave 1 (May to August, 2020)                  | 0-9 years       | 220 (200, 230)                 | 157             | -60 (-70, -50)                 | 0.73 (0.69, 0.77)               | -0.10 (-0.12, -0.08)               |
|                                               | 10-19 years     | 220 (200, 250)                 | 121             | -100 (-130, -80)               | 0.54 (0.49, 0.60)               | -0.17 (-0.21, -0.13)               |
|                                               | 20-29 years     | 410 (400, 430)                 | 347             | -60 (-80, -50)                 | 0.84 (0.81, 0.88)               | -0.07 (-0.09, -0.05)               |
|                                               | 30-39 years     | 700 (680, 720)                 | 683             | -20 (-40, 0)                   | 0.98 (0.95, 1.01)               | -0.02 (-0.04, 0.01)                |
|                                               | 40-49 years     | 1,320 (1,280, 1,360)           | 1,522           | 210 (170, 250)                 | 1.16 (1.12, 1.19)               | 0.26 (0.21, 0.31)                  |
|                                               | 50-59 years     | 2,260 (2,200, 2,310)           | 3,006           | 750 (700, 800)                 | 1.33 (1.30, 1.37)               | 1.21 (1.13, 1.30)                  |
|                                               | 60-69 years     | 3,130 (3,060, 3,210)           | 4,401           | 1,270 (1,190, 1,340)           | 1.40 (1.37, 1.44)               | 3.82 (3.58, 4.04)                  |
|                                               | 70-79 years     | 3,500 (3,420, 3,590)           | 5,023           | 1,530 (1,440, 1,610)           | 1.44 (1.40, 1.47)               | 8.18 (7.70, 8.62)                  |
|                                               | ≥80 years       | 3,350 (3,260, 3,430)           | 4,349           | 1,000 (920, 1,090)             | 1.30 (1.27, 1.33)               | 18.49 (16.95, 20.10)               |
|                                               | <b>All ages</b> | <b>15,100 (14,930, 15,270)</b> | <b>19,609</b>   | <b>4,620 (4,460, 4,790)</b>    | <b>1.31 (1.29, 1.32)</b>        | <b>0.93 (0.89, 0.96)</b>           |
| Wave 2 (March to June, 2021)                  | 0-9 years       | 210 (200, 230)                 | 139             | -70 (-90, -60)                 | 0.65 (0.61, 0.68)               | -0.13 (-0.15, -0.11)               |
|                                               | 10-19 years     | 220 (200, 250)                 | 158             | -60 (-90, -40)                 | 0.71 (0.64, 0.78)               | -0.10 (-0.15, -0.07)               |
|                                               | 20-29 years     | 410 (390, 420)                 | 430             | 20 (10, 40)                    | 1.05 (1.01, 1.09)               | 0.02 (0.01, 0.04)                  |
|                                               | 30-39 years     | 700 (680, 720)                 | 1,230           | 530 (510, 560)                 | 1.77 (1.72, 1.82)               | 0.59 (0.57, 0.62)                  |
|                                               | 40-49 years     | 1,360 (1,320, 1,400)           | 2,795           | 1,440 (1,400, 1,480)           | 2.06 (2.00, 2.12)               | 1.80 (1.75, 1.85)                  |
|                                               | 50-59 years     | 2,390 (2,330, 2,450)           | 5,177           | 2,790 (2,730, 2,840)           | 2.17 (2.11, 2.22)               | 4.39 (4.30, 4.48)                  |
|                                               | 60-69 years     | 3,350 (3,280, 3,430)           | 7,649           | 4,290 (4,220, 4,370)           | 2.28 (2.23, 2.33)               | 12.59 (12.36, 12.82)               |
|                                               | 70-79 years     | 3,860 (3,770, 3,960)           | 7,944           | 4,080 (3,990, 4,180)           | 2.06 (2.01, 2.11)               | 21.28 (20.79, 21.77)               |
|                                               | ≥80 years       | 3,670 (3,570, 3,770)           | 6,764           | 3,090 (3,000, 3,200)           | 1.84 (1.80, 1.90)               | 55.01 (53.29, 56.82)               |
|                                               | <b>All ages</b> | <b>16,170 (16,010, 16,350)</b> | <b>32,286</b>   | <b>16,350 (16,170, 16,520)</b> | <b>2.01 (1.99, 2.03)</b>        | <b>3.24 (3.21, 3.28)</b>           |

UI: uncertainty interval, generated based on parameter uncertainty and stochastic variability in model-based predicted death counts. Sex-stratified estimates are presented in **Table S8** and **Table S9**.

**Table S8: Expected and observed deaths among males during the COVID-19 pandemic in Chennai, for models without secular reporting changes amid redistricting.**

| Period                                        | Age group       | Expected deaths (95% UI)       | Observed deaths | Excess deaths (95% UI)         | Excess mortality ratio (95% UI) | Excess mortality per 1000 (95% UI) |
|-----------------------------------------------|-----------------|--------------------------------|-----------------|--------------------------------|---------------------------------|------------------------------------|
| March, 2020 to June, 2021                     | 0-9 years       | 510 (490, 530)                 | 354             | -160 (-180, -140)              | 0.69 (0.66, 0.72)               | -0.52 (-0.58, -0.45)               |
|                                               | 10-19 years     | 480 (460, 500)                 | 321             | -160 (-180, -140)              | 0.67 (0.64, 0.70)               | -0.50 (-0.56, -0.44)               |
|                                               | 20-29 years     | 1,200 (1,170, 1,220)           | 1012            | -180 (-210, -160)              | 0.85 (0.83, 0.87)               | -0.40 (-0.46, -0.34)               |
|                                               | 30-39 years     | 2,140 (2,100, 2,180)           | 2,345           | 200 (160, 240)                 | 1.10 (1.07, 1.12)               | 0.44 (0.35, 0.52)                  |
|                                               | 40-49 years     | 4,020 (3,940, 4,090)           | 4,958           | 940 (870, 1,020)               | 1.23 (1.21, 1.26)               | 2.34 (2.16, 2.52)                  |
|                                               | 50-59 years     | 6,350 (6,240, 6,450)           | 8,411           | 2,060 (1,960, 2,170)           | 1.32 (1.30, 1.35)               | 6.47 (6.16, 6.81)                  |
|                                               | 60-69 years     | 7,870 (7,750, 8,010)           | 11,605          | 3,730 (3,600, 3,860)           | 1.47 (1.45, 1.50)               | 22.45 (21.64, 23.21)               |
|                                               | 70-79 years     | 7,940 (7,820, 8,090)           | 11,702          | 3,760 (3,610, 3,880)           | 1.47 (1.45, 1.50)               | 43.19 (41.48, 44.62)               |
|                                               | ≥80 years       | 6,810 (6,690, 6,940)           | 9,694           | 2,890 (2,750, 3,000)           | 1.42 (1.40, 1.45)               | 132.33 (126.28, 137.60)            |
|                                               | <b>All ages</b> | <b>37,320 (37,040, 37,600)</b> | <b>50,402</b>   | <b>13,420 (13,150, 13,700)</b> | <b>1.36 (1.35, 1.37)</b>        | <b>5.27 (5.16, 5.38)</b>           |
| Initial lockdown (24 March to 20 April, 2020) | 0-9 years       | 27 (23, 32)                    | 22              | -5 (-10, -1)                   | 0.83 (0.70, 1.00)               | -0.02 (-0.03, 0.00)                |
|                                               | 10-19 years     | 25 (22, 29)                    | 15              | -10 (-14, -7)                  | 0.60 (0.51, 0.70)               | -0.03 (-0.05, -0.02)               |
|                                               | 20-29 years     | 65 (59,72)                     | 27              | -40 (-50, -30)                 | 0.41 (0.37, 0.46)               | -0.08 (-0.10, -0.07)               |
|                                               | 30-39 years     | 120 (110, 130)                 | 79              | -40 (-50, -30)                 | 0.69 (0.53, 0.74)               | -0.08 (-0.10, -0.06)               |
|                                               | 40-49 years     | 220 (200, 240)                 | 175             | -40 (-60, -30)                 | 0.80 (0.74, 0.86)               | -0.11 (-0.15, -0.07)               |
|                                               | 50-59 years     | 340 (310, 360)                 | 283             | -50 (-80, -30)                 | 0.84 (0.79, 0.90)               | -0.17 (-0.24, -0.10)               |
|                                               | 60-69 years     | 400 (370, 430)                 | 390             | -10 (-40, 20)                  | 0.98 (0.91, 1.04)               | -0.06 (-0.24, 0.10)                |
|                                               | 70-79 years     | 410 (380, 440)                 | 387             | -20 (-50, 10)                  | 0.95 (0.89, 1.03)               | -0.22 (-0.59, 0.12)                |
|                                               | ≥80 years       | 350 (320, 380)                 | 384             | 40 (10, 60)                    | 1.10 (1.02, 1.19)               | 1.67 (0.33, 2.85)                  |
|                                               | <b>All ages</b> | <b>1,940 (1,880, 2,000)</b>    | <b>1,762</b>    | <b>-170 (-230, -110)</b>       | <b>0.91 (0.88, 0.94)</b>        | <b>-0.07 (-0.09, -0.04)</b>        |
| Wave 1 (May to August, 2020)                  | 0-9 years       | 120 (110, 130)                 | 77              | -40 (-50, -30)                 | 0.64 (0.60, 0.69)               | -0.14 (-0.17, -0.11)               |
|                                               | 10-19 years     | 115 (107, 124)                 | 62              | -50 (-60, -40)                 | 0.54 (0.50, 0.58)               | -0.16 (-0.19, -0.14)               |
|                                               | 20-29 years     | 300 (280, 310)                 | 218             | -80 (-90, -60)                 | 0.74 (0.70, 0.77)               | -0.17 (-0.20, -0.14)               |
|                                               | 30-39 years     | 510 (500, 530)                 | 486             | -30 (-50, -10)                 | 0.95 (0.91, 0.98)               | -0.06 (-0.10, -0.02)               |
|                                               | 40-49 years     | 920 (890, 960)                 | 1,001           | 80 (40, 110)                   | 1.09 (1.05, 1.13)               | 0.20 (0.11, 0.28)                  |
|                                               | 50-59 years     | 1,430 (1,390, 1,480)           | 1,889           | 460 (410, 500)                 | 1.32 (1.28, 1.36)               | 1.45 (1.31, 1.59)                  |
|                                               | 60-69 years     | 1,760 (1,710, 1,820)           | 2,516           | 750 (690, 810)                 | 1.43 (1.38, 1.47)               | 4.59 (4.21, 4.92)                  |
|                                               | 70-79 years     | 1,780 (1,720, 1,840)           | 2,723           | 940 (880, 1,000)               | 1.53 (1.48, 1.58)               | 10.96 (10.24, 11.64)               |
|                                               | ≥80 years       | 1,470 (1,420, 1,530)           | 2,153           | 680 (630, 730)                 | 1.46 (1.41, 1.51)               | 31.85 (29.22, 34.15)               |
|                                               | <b>All ages</b> | <b>8,420 (8,310, 8,540)</b>    | <b>11,125</b>   | <b>2,780 (2,660, 2,890)</b>    | <b>1.33 (1.31, 1.35)</b>        | <b>1.10 (1.05, 1.14)</b>           |
| Wave 2 (March to June, 2021)                  | 0-9 years       | 115 (106, 125)                 | 74              | -40 (-50, -30)                 | 0.64 (0.59, 0.70)               | -0.13 (-0.16, -0.11)               |
|                                               | 10-19 years     | 120 (110, 130)                 | 90              | -30 (-40, -20)                 | 0.77 (0.71, 0.83)               | -0.09 (-0.11, -0.06)               |
|                                               | 20-29 years     | 290 (280, 310)                 | 277             | -20 (-30, 0)                   | 0.94 (0.90, 0.99)               | -0.04 (-0.07, -0.01)               |
|                                               | 30-39 years     | 510 (490, 530)                 | 874             | 360 (340, 380)                 | 1.71 (1.65, 1.78)               | 0.78 (0.74, 0.82)                  |
|                                               | 40-49 years     | 950 (920, 990)                 | 1,863           | 910 (870, 940)                 | 1.96 (1.88, 2.03)               | 2.25 (2.16, 2.33)                  |
|                                               | 50-59 years     | 1,510 (1,460, 1,570)           | 3,066           | 1,550 (1,500, 1,610)           | 2.03 (1.96, 2.10)               | 4.82 (4.65, 4.98)                  |
|                                               | 60-69 years     | 1,860 (1,800, 1,920)           | 4,322           | 2,460 (2,400, 2,520)           | 2.32 (2.25, 2.40)               | 14.62 (14.26, 14.97)               |
|                                               | 70-79 years     | 1,920 (1,850, 1,990)           | 4,283           | 2,360 (2,300, 2,430)           | 2.23 (2.15, 2.31)               | 26.80 (26.02, 27.57)               |
|                                               | ≥80 years       | 1,620 (1,560, 1,680)           | 3,418           | 1,800 (1,740, 1,860)           | 2.11 (2.03, 2.19)               | 81.04 (78.19, 83.50)               |
|                                               | <b>All ages</b> | <b>8,900 (8,780, 9,020)</b>    | <b>18,267</b>   | <b>9,510 (9,390, 9,640)</b>    | <b>2.07 (2.04, 2.10)</b>        | <b>3.72 (3.67, 3.77)</b>           |

UI: uncertainty interval, generated based on parameter uncertainty and stochastic variability in model-based predicted death counts.

**Table S9: Expected and observed deaths among females during the COVID-19 pandemic in Chennai, for models without secular reporting changes amid redistricting.**

| Period                                        | Age group       | Expected deaths (95% UI)       | Observed deaths | Excess deaths (95% UI)      | Excess mortality ratio (95% UI) | Excess mortality per 1000 (95% UI) |
|-----------------------------------------------|-----------------|--------------------------------|-----------------|-----------------------------|---------------------------------|------------------------------------|
| March, 2020 to June, 2021                     | 0-9 years       | 440 (420, 460)                 | 314             | -130 (-140, -110)           | 0.71 (0.69, 0.74)               | -0.44 (-0.51, -0.38)               |
|                                               | 10-19 years     | 460 (420, 510)                 | 257             | -200 (-250, -160)           | 0.56 (0.51, 0.61)               | -0.68 (-0.83, -0.54)               |
|                                               | 20-29 years     | 490 (480, 510)                 | 517             | 20 (10, 40)                 | 1.05 (1.01, 1.08)               | 0.05 (0.01, 0.09)                  |
|                                               | 30-39 years     | 810 (780, 830)                 | 944             | 140 (120, 160)              | 1.17 (1.14, 1.21)               | 0.32 (0.27, 0.37)                  |
|                                               | 40-49 years     | 1,670 (1,630, 1,700)           | 2,388           | 720 (680, 760)              | 1.43 (1.40, 1.46)               | 1.85 (1.75, 1.94)                  |
|                                               | 50-59 years     | 3,510 (3,450, 3,570)           | 5,061           | 1,550 (1,490, 1,610)        | 1.44 (1.42, 1.47)               | 5.03 (4.84, 5.22)                  |
|                                               | 60-69 years     | 6,030 (5,910, 6,140)           | 8,424           | 2,390 (2,290, 2,510)        | 1.40 (1.37, 1.42)               | 14.03 (13.41, 14.72)               |
|                                               | 70-79 years     | 7,670 (7,540, 7,820)           | 9,986           | 2,310 (2,170, 2,440)        | 1.30 (1.28, 1.32)               | 22.65 (21.25, 23.94)               |
|                                               | ≥80 years       | 8,320 (8,170, 8,470)           | 9,799           | 1,480 (1,330, 1,630)        | 1.18 (1.16, 1.20)               | 44.39 (39.94, 48.93)               |
|                                               | <b>All ages</b> | <b>29,400 (29,140, 29,680)</b> | <b>37,690</b>   | <b>8,520 (8,240, 8,770)</b> | <b>1.29 (1.28, 1.30)</b>        | <b>3.44 (3.33, 3.55)</b>           |
| Initial lockdown (24 March to 20 April, 2020) | 0-9 years       | 26 (22, 31)                    | 18              | -8 (-13, -4)                | 0.69 (0.59, 0.83)               | -0.03 (-0.04, -0.01)               |
|                                               | 10-19 years     | 16 (12, 25)                    | 10              | -6 (-15, -2)                | 0.61 (0.41, 0.87)               | -0.02 (-0.05, -0.01)               |
|                                               | 20-29 years     | 30 (26, 35)                    | 18              | -12 (-17, -8)               | 0.60 (0.52, 0.68)               | -0.03 (-0.04, -0.02)               |
|                                               | 30-39 years     | 40 (35, 45)                    | 52              | 12 (7, 17)                  | 1.31 (1.15, 1.48)               | 0.03 (0.02, 0.04)                  |
|                                               | 40-49 years     | 90 (80, 100)                   | 89              | 0 (-10, 10)                 | 1.00 (0.91, 1.09)               | 0.00 (-0.02, 0.04)                 |
|                                               | 50-59 years     | 180 (170, 200)                 | 179             | 0 (-20, 10)                 | 0.98 (0.91, 1.05)               | -0.01 (-0.06, 0.03)                |
|                                               | 60-69 years     | 310 (280, 330)                 | 295             | -10 (-40, 10)               | 0.97 (0.89, 1.04)               | -0.06 (-0.21, 0.07)                |
|                                               | 70-79 years     | 410 (380, 440)                 | 380             | -30 (-60, 0)                | 0.94 (0.87, 1.01)               | -0.26 (-0.56, 0.03)                |
|                                               | ≥80 years       | 420 (390, 450)                 | 440             | 20 (-10, 50)                | 1.05 (0.98, 1.14)               | 0.63 (-0.30, 1.64)                 |
|                                               | <b>All ages</b> | <b>1,520 (1,470, 1,570)</b>    | <b>1,481</b>    | <b>-20 (-70, 30)</b>        | <b>0.99 (0.95, 1.02)</b>        | <b>-0.01 (-0.03, 0.01)</b>         |
| Wave 1 (May to August, 2020)                  | 0-9 years       | 94 (86, 103)                   | 80              | -14 (-23, -6)               | 0.85 (0.78, 0.93)               | -0.05 (-0.08, -0.02)               |
|                                               | 10-19 years     | 110 (90, 130)                  | 59              | -50 (-70, -30)              | 0.54 (0.45, 0.65)               | -0.17 (-0.24, -0.11)               |
|                                               | 20-29 years     | 115 (108, 123)                 | 129             | 14 (6, 21)                  | 1.12 (1.05, 1.20)               | 0.03 (0.01, 0.05)                  |
|                                               | 30-39 years     | 190 (180, 200)                 | 196             | 10 (0, 20)                  | 1.06 (1.000, 1.12)              | 0.03 (0.00, 0.05)                  |
|                                               | 40-49 years     | 390 (380, 410)                 | 519             | 130 (110, 140)              | 1.33 (1.27, 1.38)               | 0.33 (0.28, 0.37)                  |
|                                               | 50-59 years     | 820 (790, 850)                 | 1,117           | 290 (270, 320)              | 1.36 (1.31, 1.41)               | 0.97 (0.88, 1.06)                  |
|                                               | 60-69 years     | 1,370 (1,320, 1,420)           | 1,884           | 510 (470, 560)              | 1.37 (1.33, 1.43)               | 3.05 (2.78, 3.34)                  |
|                                               | 70-79 years     | 1,720 (1,660, 1,780)           | 2,300           | 580 (520, 640)              | 1.34 (1.29, 1.39)               | 5.81 (5.19, 6.39)                  |
|                                               | ≥80 years       | 1,880 (1,810, 1,950)           | 2,196           | 320 (250, 390)              | 1.17 (1.13, 1.21)               | 9.79 (7.56, 11.79)                 |
|                                               | <b>All ages</b> | <b>6,680 (6,580, 6,790)</b>    | <b>8,480</b>    | <b>1,840 (1,730, 1,950)</b> | <b>1.28 (1.25, 1.30)</b>        | <b>0.74 (0.70, 0.79)</b>           |
| Wave 2 (March to June, 2021)                  | 0-9 years       | 100 (90, 110)                  | 65              | -34 (-42, -26)              | 0.66 (0.60, 0.71)               | -0.12 (-0.15, -0.09)               |
|                                               | 10-19 years     | 110 (90, 130)                  | 68              | -40 (-60, -20)              | 0.65 (0.53, 0.78)               | -0.12 (-0.20, -0.06)               |
|                                               | 20-29 years     | 115 (108, 123)                 | 152             | 37 (29, 44)                 | 1.32 (1.24, 1.41)               | 0.08 (0.06, 0.10)                  |
|                                               | 30-39 years     | 190 (180, 200)                 | 356             | 170 (160, 180)              | 1.93 (1.82, 2.04)               | 0.39 (0.37, 0.42)                  |
|                                               | 40-49 years     | 410 (390, 420)                 | 929             | 520 (510, 540)              | 2.29 (2.20, 2.40)               | 1.33 (1.29, 1.38)                  |
|                                               | 50-59 years     | 880 (850, 910)                 | 2107            | 1,230 (1,200, 1,260)        | 2.40 (2.32, 2.49)               | 3.94 (3.85, 4.04)                  |
|                                               | 60-69 years     | 1,490 (1,450, 1,540)           | 3324            | 1,830 (1,780, 1,880)        | 2.23 (2.15, 2.30)               | 10.59 (10.30, 10.87)               |
|                                               | 70-79 years     | 1,950 (1,880, 2,010)           | 3662            | 1,720 (1,660, 1,790)        | 1.88 (1.83, 1.95)               | 16.58 (15.99, 17.24)               |
|                                               | ≥80 years       | 2,050 (1,980, 2,130)           | 3346            | 1,290 (1,220, 1,370)        | 1.63 (1.57, 1.69)               | 37.97 (35.74, 40.21)               |
|                                               | <b>All ages</b> | <b>7,280 (7,160, 7,400)</b>    | <b>14,009</b>   | <b>6,830 (6,700, 6,940)</b> | <b>1.94 (1.91, 1.97)</b>        | <b>2.75 (2.70, 2.79)</b>           |

UI: uncertainty interval, generated based on parameter uncertainty and stochastic variability in model-based predicted death counts.

**Table S10: Expected and observed deaths during the COVID-19 pandemic in Chennai, for models fitted to 7-day moving average mortality time series.**

| Period                                        | Age group       | Expected deaths (95% UI)       | Observed deaths | Excess deaths (95% UI)         | Excess mortality ratio (95% UI) | Excess mortality per 1000 (95% UI) |
|-----------------------------------------------|-----------------|--------------------------------|-----------------|--------------------------------|---------------------------------|------------------------------------|
| March, 2020 to June, 2021                     | 0-9 years       | 1,050 (1,010, 1,100)           | 668             | -380 (-430, -340)              | 0.63 (0.61, 0.66)               | -0.65 (-0.72, -0.58)               |
|                                               | 10-19 years     | 920 (860, 970)                 | 579             | -340 (-390, -280)              | 0.63 (0.60, 0.67)               | -0.54 (-0.63, -0.46)               |
|                                               | 20-29 years     | 1,800 (1,750, 1,850)           | 1,530           | -270 (-310, -220)              | 0.85 (0.83, 0.88)               | -0.29 (-0.35, -0.24)               |
|                                               | 30-39 years     | 2,950 (2,890, 3,010)           | 3,291           | 340 (280, 400)                 | 1.12 (1.09, 1.14)               | 0.38 (0.31, 0.45)                  |
|                                               | 40-49 years     | 5,600 (5,500, 5,690)           | 7,350           | 1,750 (1,660, 1,850)           | 1.31 (1.29, 1.34)               | 2.21 (2.09, 2.33)                  |
|                                               | 50-59 years     | 9,430 (9,280, 9,560)           | 13,475          | 4,050 (3,920, 4,200)           | 1.43 (1.41, 1.45)               | 6.46 (6.25, 6.70)                  |
|                                               | 60-69 years     | 12,970 (12,790, 13,170)        | 20,033          | 7,060 (6,870, 7,240)           | 1.54 (1.52, 1.57)               | 20.96 (20.39, 21.50)               |
|                                               | 70-79 years     | 14,130 (13,920, 14,350)        | 21,687          | 7,560 (7,330, 7,760)           | 1.54 (1.51, 1.56)               | 39.97 (38.78, 41.05)               |
|                                               | ≥80 years       | 14,100 (13,900, 14,320)        | 19,494          | 5,390 (5,170, 5,600)           | 1.38 (1.36, 1.40)               | 97.71 (93.69, 101.42)              |
|                                               | <b>All ages</b> | <b>62,950 (62,500, 63,350)</b> | <b>88,107</b>   | <b>25,730 (25,320, 26,170)</b> | <b>1.41 (1.40, 1.42)</b>        | <b>5.13 (5.04, 5.21)</b>           |
| Initial lockdown (24 March to 20 April, 2020) | 0-9 years       | 52 (45, 62)                    | 40              | -12 (-22, -5)                  | 0.77 (0.65, 0.90)               | -0.02 (-0.04, -0.01)               |
|                                               | 10-19 years     | 40 (30, 50)                    | 25              | -20 (-30, -10)                 | 0.59 (0.47, 0.74)               | -0.03 (-0.05, -0.01)               |
|                                               | 20-29 years     | 100 (90, 110)                  | 45              | -60 (-70, -50)                 | 0.45 (0.40, 0.50)               | -0.06 (-0.07, -0.05)               |
|                                               | 30-39 years     | 160 (140, 170)                 | 131             | -20 (-40, -10)                 | 0.84 (0.78, 0.91)               | -0.03 (-0.04, -0.01)               |
|                                               | 40-49 years     | 310 (290, 330)                 | 264             | -40 (-70, -20)                 | 0.86 (0.80, 0.93)               | -0.05 (-0.09, -0.03)               |
|                                               | 50-59 years     | 510 (480, 540)                 | 462             | -40 (-80, -20)                 | 0.91 (0.86, 0.97)               | -0.07 (-0.12, -0.03)               |
|                                               | 60-69 years     | 670 (630, 710)                 | 685             | 10 (-30, 50)                   | 1.02 (0.96, 1.09)               | 0.04 (-0.09, 0.16)                 |
|                                               | 70-79 years     | 760 (720, 800)                 | 767             | 10 (-40, 50)                   | 1.01 (0.95, 1.07)               | 0.04 (-0.19, 0.28)                 |
|                                               | ≥80 years       | 730 (690, 780)                 | 824             | 90 (50, 140)                   | 1.13 (1.06, 1.20)               | 1.72 (0.88, 2.52)                  |
|                                               | <b>All ages</b> | <b>3,330 (3,240, 3,420)</b>    | <b>3,243</b>    | <b>-60 (-150, 30)</b>          | <b>0.98 (0.96, 1.01)</b>        | <b>-0.01 (-0.03, 0.01)</b>         |
| Wave 1 (May to August, 2020)                  | 0-9 years       | 230 (210, 250)                 | 157             | -70 (-90, -50)                 | 0.69 (0.63, 0.74)               | -0.12 (-0.15, -0.09)               |
|                                               | 10-19 years     | 220 (190, 240)                 | 121             | -100 (-120, -70)               | 0.56 (0.50, 0.63)               | -0.15 (-0.20, -0.11)               |
|                                               | 20-29 years     | 430 (410, 460)                 | 347             | -80 (-110, -60)                | 0.80 (0.76, 0.85)               | -0.09 (-0.12, -0.07)               |
|                                               | 30-39 years     | 700 (670, 730)                 | 683             | -10 (-40, 10)                  | 0.98 (0.94, 1.02)               | -0.01 (-0.05, 0.01)                |
|                                               | 40-49 years     | 1,290 (1,250, 1,340)           | 1,522           | 230 (180, 270)                 | 1.18 (1.14, 1.22)               | 0.29 (0.23, 0.35)                  |
|                                               | 50-59 years     | 2,160 (2,100, 2,230)           | 3,006           | 840 (780, 910)                 | 1.39 (1.35, 1.43)               | 1.36 (1.26, 1.46)                  |
|                                               | 60-69 years     | 2,930 (2,850, 3,020)           | 4,401           | 1,470 (1,390, 1,550)           | 1.50 (1.46, 1.54)               | 4.43 (4.17, 4.66)                  |
|                                               | 70-79 years     | 3,190 (3,090, 3,280)           | 5,023           | 1,840 (1,740, 1,930)           | 1.58 (1.53, 1.62)               | 9.85 (9.34, 10.34)                 |
|                                               | ≥80 years       | 3,130 (3,030, 3,230)           | 4,349           | 1,220 (1,120, 1,320)           | 1.39 (1.35, 1.44)               | 22.58 (20.71, 24.40)               |
|                                               | <b>All ages</b> | <b>14,280 (14,090, 14,470)</b> | <b>19,609</b>   | <b>5,450 (5,260, 5,640)</b>    | <b>1.38 (1.36, 1.40)</b>        | <b>1.09 (1.05, 1.13)</b>           |
| Wave 2 (March to June, 2021)                  | 0-9 years       | 230 (210, 250)                 | 139             | -90 (-1100, -70)               | 0.61 (0.56, 0.66)               | -0.15 (-0.19, -0.12)               |
|                                               | 10-19 years     | 220 (200, 240)                 | 158             | -60 (-90, -40)                 | 0.73 (0.65, 0.81)               | -0.10 (-0.14, -0.06)               |
|                                               | 20-29 years     | 430 (410, 460)                 | 430             | 0 (-30, 20)                    | 0.99 (0.94, 1.05)               | 0.00 (-0.03, 0.02)                 |
|                                               | 30-39 years     | 690 (660, 720)                 | 1,230           | 540 (510, 570)                 | 1.78 (1.71, 1.85)               | 0.60 (0.57, 0.63)                  |
|                                               | 40-49 years     | 1,320 (1,270, 1,370)           | 2,795           | 1,480 (1,430, 1,520)           | 2.12 (2.05, 2.20)               | 1.85 (1.79, 1.91)                  |
|                                               | 50-59 years     | 2,240 (2,170, 2,310)           | 5,177           | 2,940 (2,870, 3,010)           | 2.31 (2.25, 2.39)               | 4.63 (4.53, 4.74)                  |
|                                               | 60-69 years     | 3,030 (2,950, 3,120)           | 7,649           | 4,620 (4,530, 4,700)           | 2.52 (2.45, 2.60)               | 13.53 (13.28, 13.78)               |
|                                               | 70-79 years     | 3,340 (3,250, 3,440)           | 7,944           | 4,600 (4,510, 4,700)           | 2.38 (2.31, 2.45)               | 23.99 (23.51, 24.48)               |
|                                               | ≥80 years       | 3,320 (3,220, 3,420)           | 6,764           | 3,440 (3,340, 3,540)           | 2.04 (1.98, 2.10)               | 61.23 (59.42, 62.98)               |
|                                               | <b>All ages</b> | <b>14,820 (14,620, 15,020)</b> | <b>32,286</b>   | <b>17,700 (17,500, 17,900)</b> | <b>2.19 (2.17, 2.22)</b>        | <b>3.51 (3.47, 3.55)</b>           |

UI: uncertainty interval, generated based on parameter uncertainty and stochastic variability in model-based predicted death counts. Accompanying model predictions are presented in **Figure S5**.

**Table S11: Expected and observed deaths during the COVID-19 pandemic in Chennai, for models fitted to 28-day moving average mortality time series.**

| Period                       | Age group                                     | Expected deaths (95% UI)       | Observed deaths | Excess deaths (95% UI)         | Excess mortality ratio (95% UI) | Excess mortality per 1000 (95% UI) |
|------------------------------|-----------------------------------------------|--------------------------------|-----------------|--------------------------------|---------------------------------|------------------------------------|
| March, 2020 to June, 2021    | 0-9 years                                     | 960 (940, 980)                 | 668             | -290 (-310, -270)              | 0.70 (0.68, 0.71)               | -0.49 (-0.53, -0.46)               |
|                              | 10-19 years                                   | 880 (840, 920)                 | 579             | -300 (-340, -260)              | 0.66 (0.63, 0.69)               | -0.48 (-0.55, -0.43)               |
|                              | 20-29 years                                   | 1,700 (1,670, 1,730)           | 1,530           | -170 (-200, -140)              | 0.90 (0.88, 0.91)               | -0.19 (-0.22, -0.16)               |
|                              | 30-39 years                                   | 2,900 (2,860, 2,940)           | 3,291           | 390 (350, 430)                 | 1.13 (1.12, 1.15)               | 0.44 (0.39, 0.48)                  |
|                              | 40-49 years                                   | 5,500 (5,430, 5,560)           | 7,350           | 1,850 (1,790, 1,920)           | 1.34 (1.32, 1.35)               | 2.34 (2.26, 2.42)                  |
|                              | 50-59 years                                   | 9,270 (9,170, 9,360)           | 13,475          | 4,200 (4,120, 4,310)           | 1.45 (1.44, 1.47)               | 6.71 (6.57, 6.87)                  |
|                              | 60-69 years                                   | 12,900 (12,760, 13,040)        | 20,033          | 7,140 (7,000, 7,270)           | 1.55 (1.54, 1.57)               | 21.19 (20.77, 21.59)               |
|                              | 70-79 years                                   | 14,050 (13,900, 14,210)        | 21,687          | 7,640 (7,480, 7,790)           | 1.54 (1.53, 1.56)               | 40.39 (39.55, 41.18)               |
|                              | ≥80 years                                     | 14,040 (13,880, 14,210)        | 19,494          | 5,460 (5,290, 5,610)           | 1.39 (1.37, 1.40)               | 98.87 (95.81, 101.74)              |
|                              | <b>All ages</b>                               | <b>62,190 (61,880, 62,480)</b> | <b>88,107</b>   | <b>26,480 (26,190, 26,800)</b> | <b>1.43 (1.42, 1.44)</b>        | <b>5.28 (5.22, 5.34)</b>           |
|                              | Initial lockdown (24 March to 20 April, 2020) | 0-9 years                      | 53 (49, 58)     | 40                             | -13 (-18, -9)                   | 0.75 (0.69, 0.81)                  |
| 10-19 years                  |                                               | 37 (32, 43)                    | 25              | -12 (-18, -7)                  | 0.68 (0.58, 0.78)               | -0.02 (-0.03, -0.01)               |
| 20-29 years                  |                                               | 97 (90, 104)                   | 45              | -52 (59, -45)                  | 0.47 (0.43, 0.50)               | -0.06 (-0.07, -0.05)               |
| 30-39 years                  |                                               | 150 (140, 160)                 | 131             | -20 (-30, -10)                 | 0.86 (0.82, 0.91)               | -0.02 (-0.03, -0.01)               |
| 40-49 years                  |                                               | 300 (280, 320)                 | 264             | -30 (-50, -20)                 | 0.89 (0.84, 0.93)               | -0.04 (-0.06, -0.02)               |
| 50-59 years                  |                                               | 500 (480, 520)                 | 462             | -40 (-60, -20)                 | 0.93 (0.89, 0.96)               | -0.06 (-0.09, -0.03)               |
| 60-69 years                  |                                               | 670 (640, 700)                 | 685             | 20 (-10, 50)                   | 1.02 (0.98, 1.07)               | 0.05 (-0.04, 0.14)                 |
| 70-79 years                  |                                               | 750 (720, 780)                 | 767             | 20 (-20, 50)                   | 1.02 (0.98, 1.07)               | 0.08 (-0.09, 0.25)                 |
| ≥80 years                    |                                               | 730 (700, 770)                 | 824             | 90 (60, 120)                   | 1.12 (1.07, 1.18)               | 1.69 (1.05, 2.30)                  |
| <b>All ages</b>              |                                               | <b>3,290 (3,220, 3,350)</b>    | <b>3,243</b>    | <b>-20 (-90, 40)</b>           | <b>0.99 (0.97, 1.01)</b>        | <b>0.00 (-0.02, 0.01)</b>          |
| Wave 1 (May to August, 2020) |                                               | 0-9 years                      | 220 (210, 230)  | 157                            | -65 (-75, -56)                  | 0.71 (0.68, 0.74)                  |
|                              | 10-19 years                                   | 220 (200, 240)                 | 121             | -90 (-110, -80)                | 0.56 (0.51, 0.61)               | -0.15 (-0.18, -0.13)               |
|                              | 20-29 years                                   | 410 (400, 420)                 | 347             | -60 (-80, -50)                 | 0.85 (0.82, 0.88)               | -0.07 (-0.08, -0.05)               |
|                              | 30-39 years                                   | 680 (660, 700)                 | 683             | 0 (-20, 20)                    | 1.00 (0.98, 1.03)               | 0.00 (-0.02, 0.02)                 |
|                              | 40-49 years                                   | 1,270 (1,240, 1,300)           | 1,522           | 250 (220, 280)                 | 1.20 (1.17, 1.23)               | 0.32 (0.28, 0.36)                  |
|                              | 50-59 years                                   | 2,140 (2,090, 2,180)           | 3,006           | 870 (830, 910)                 | 1.41 (1.38, 1.44)               | 1.41 (1.34, 1.48)                  |
|                              | 60-69 years                                   | 2,930 (2,870, 2,990)           | 4,401           | 1,480 (1,420, 1,530)           | 1.50 (1.47, 1.53)               | 4.44 (4.26, 4.61)                  |
|                              | 70-79 years                                   | 3,180 (3,120, 3,250)           | 5,023           | 1,840 (1,770, 1,910)           | 1.58 (1.55, 1.61)               | 9.87 (9.50, 10.22)                 |
|                              | ≥80 years                                     | 3,120 (3,050, 3,200)           | 4,349           | 1,230 (1,150, 1,300)           | 1.39 (1.36, 1.43)               | 22.73 (21.28, 24.10)               |
|                              | <b>All ages</b>                               | <b>14,170 (14,030, 14,300)</b> | <b>19,609</b>   | <b>5,560 (5,420, 5,700)</b>    | <b>1.39 (1.38, 1.41)</b>        | <b>1.11 (1.09, 1.14)</b>           |
|                              | Wave 2 (March to June, 2021)                  | 0-9 years                      | 220 (210, 230)  | 139                            | -80 (-90, -70)                  | 0.63 (0.61, 0.66)                  |
| 10-19 years                  |                                               | 200 (190, 220)                 | 158             | -40 (-60, -30)                 | 0.80 (0.73, 0.85)               | -0.07 (-0.09, -0.04)               |
| 20-29 years                  |                                               | 410 (400, 430)                 | 430             | 20 (0, 30)                     | 1.04 (1.01, 1.08)               | 0.02 (0.00, 0.03)                  |
| 30-39 years                  |                                               | 680 (660, 700)                 | 1,230           | 550 (530, 570)                 | 1.82 (1.77, 1.87)               | 0.62 (0.59, 0.64)                  |
| 40-49 years                  |                                               | 1,290 (1,260, 1,320)           | 2,795           | 1,510 (1,470, 1,540)           | 2.17 (2.12, 2.22)               | 1.89 (1.85, 1.92)                  |
| 50-59 years                  |                                               | 2,200 (2,150, 2,250)           | 5,177           | 2,980 (2,930, 3,020)           | 2.35 (2.30, 2.40)               | 4.69 (4.62, 4.77)                  |
| 60-69 years                  |                                               | 3,030 (2,970, 3,090)           | 7,649           | 4,620 (4,560, 4,680)           | 2.53 (2.48, 2.58)               | 13.54 (13.37, 13.73)               |
| 70-79 years                  |                                               | 3,340 (3,270, 3,410)           | 7,944           | 4,600 (4,540, 4,670)           | 2.38 (2.33, 2.43)               | 24.00 (23.65, 24.35)               |
| ≥80 years                    |                                               | 3,330 (3,250, 3,400)           | 6,764           | 3,440 (3,360, 3,510)           | 2.03 (1.99, 2.08)               | 61.15 (59.79, 62.47)               |
| <b>All ages</b>              |                                               | <b>14,690 (14,550, 14,840)</b> | <b>32,286</b>   | <b>17,830 (17,690, 17,980)</b> | <b>2.21 (2.19, 2.24)</b>        | <b>3.54 (3.51, 3.56)</b>           |

UI: uncertainty interval, generated based on parameter uncertainty and stochastic variability in model-based predicted death counts. Accompanying model predictions are presented in **Figure S6**.



**Table S12: Annualized life tables for males in Chennai, 2019-2021.**

| Age group   | Year                                                     | Deaths | Mortality per 1000<br>(95% UI) | Life expectancy at<br>entry (95% CI), years |
|-------------|----------------------------------------------------------|--------|--------------------------------|---------------------------------------------|
| 0-4 years   | 2019                                                     | 236    | 1.4 (1.3, 1.6)                 | 68.0 (67.9, 68.2)                           |
|             | 2020                                                     | 200    | 1.2 (1.0, 1.4)                 | 66.9 (66.8, 67.1)                           |
|             | 2021 (assuming Jul.-Dec. per 2019 baseline) <sup>1</sup> | 227    | 1.4 (1.2, 1.6)                 | 64.6 (64.4, 64.7)                           |
|             | 2021 (assuming Jul.-Dec. per 2020) <sup>2</sup>          | 192    | 1.2 (1.0, 1.3)                 | 63.9 (63.8, 64.0)                           |
| 5-9 years   | 2019                                                     | 115    | 0.8 (0.7, 1.0)                 | 63.5 (63.3, 63.7)                           |
|             | 2020                                                     | 76     | 0.5 (0.4, 0.7)                 | 62.3 (62.2, 62.5)                           |
|             | 2021 (assuming Jul.-Dec. per 2019 baseline) <sup>1</sup> | 95     | 0.7 (0.5, 0.8)                 | 60.0 (59.9, 60.2)                           |
|             | 2021 (assuming Jul.-Dec. per 2020) <sup>2</sup>          | 77     | 0.5 (0.4, 0.7)                 | 59.3 (59.1, 59.4)                           |
| 10-14 years | 2019                                                     | 96     | 0.6 (0.5, 0.8)                 | 58.7 (58.6, 58.9)                           |
|             | 2020                                                     | 50     | 0.3 (0.3, 0.4)                 | 57.5 (57.4, 57.6)                           |
|             | 2021 (assuming Jul.-Dec. per 2019 baseline) <sup>1</sup> | 96     | 0.6 (0.5, 0.8)                 | 55.2 (55.1, 55.3)                           |
|             | 2021 (assuming Jul.-Dec. per 2020) <sup>2</sup>          | 77     | 0.5 (0.4, 0.6)                 | 54.4 (54.3, 54.5)                           |
| 15-19 years | 2019                                                     | 203    | 1.2 (1.0, 1.4)                 | 53.9 (53.8, 54.1)                           |
|             | 2020                                                     | 148    | 0.9 (0.7, 1.0)                 | 52.6 (52.5, 52.7)                           |
|             | 2021 (assuming Jul.-Dec. per 2019 baseline) <sup>1</sup> | 172    | 1.0 (0.9, 1.2)                 | 50.4 (50.2, 50.5)                           |
|             | 2021 (assuming Jul.-Dec. per 2020) <sup>2</sup>          | 173    | 1.0 (0.9, 1.2)                 | 49.6 (49.4, 49.7)                           |
| 20-24 years | 2019                                                     | 348    | 1.7 (1.5, 1.8)                 | 49.2 (49.1, 49.4)                           |
|             | 2020                                                     | 266    | 1.3 (1.1, 1.4)                 | 47.8 (47.7, 48.0)                           |
|             | 2021 (assuming Jul.-Dec. per 2019 baseline) <sup>1</sup> | 330    | 1.6 (1.4, 1.7)                 | 45.6 (45.5, 45.7)                           |
|             | 2021 (assuming Jul.-Dec. per 2020) <sup>2</sup>          | 312    | 1.5 (1.3, 1.6)                 | 44.8 (44.7, 44.9)                           |
| 25-29 years | 2019                                                     | 457    | 1.9 (1.7, 2.1)                 | 44.6 (44.5, 44.8)                           |
|             | 2020                                                     | 380    | 1.6 (1.4, 1.7)                 | 43.1 (43.0, 43.2)                           |
|             | 2021 (assuming Jul.-Dec. per 2019 baseline) <sup>1</sup> | 469    | 1.9 (1.8, 2.1)                 | 40.9 (40.8, 41.1)                           |
|             | 2021 (assuming Jul.-Dec. per 2020) <sup>2</sup>          | 458    | 1.9 (1.7, 2.0)                 | 40.1 (40.0, 40.2)                           |
| 30-34 years | 2019                                                     | 592    | 2.5 (2.3, 2.7)                 | 40.0 (39.9, 40.2)                           |
|             | 2020                                                     | 589    | 2.5 (2.3, 2.7)                 | 38.4 (38.3, 38.6)                           |
|             | 2021 (assuming Jul.-Dec. per 2019 baseline) <sup>1</sup> | 713    | 3.0 (2.8, 3.2)                 | 36.3 (36.2, 36.4)                           |
|             | 2021 (assuming Jul.-Dec. per 2020) <sup>2</sup>          | 739    | 3.1 (2.9, 3.3)                 | 35.5 (35.3, 35.6)                           |
| 35-39 years | 2019                                                     | 936    | 4.3 (4.0, 4.6)                 | 35.5 (35.4, 35.7)                           |
|             | 2020                                                     | 831    | 3.8 (3.5, 4.1)                 | 33.9 (33.8, 34.0)                           |
|             | 2021 (assuming Jul.-Dec. per 2019 baseline) <sup>1</sup> | 1,150  | 5.2 (4.9, 5.5)                 | 31.8 (31.7, 32.0)                           |
|             | 2021 (assuming Jul.-Dec. per 2020) <sup>2</sup>          | 1,124  | 5.1 (4.8, 5.4)                 | 31.0 (30.9, 31.1)                           |
| 40-44 years | 2019                                                     | 1,058  | 5.2 (4.9, 5.6)                 | 31.2 (31.1, 31.4)                           |
|             | 2020                                                     | 1,167  | 5.7 (5.4, 6.0)                 | 29.5 (29.4, 29.6)                           |
|             | 2021 (assuming Jul.-Dec. per 2019 baseline) <sup>1</sup> | 1,496  | 7.3 (6.9, 7.7)                 | 27.6 (27.5, 27.7)                           |
|             | 2021 (assuming Jul.-Dec. per 2020) <sup>2</sup>          | 1,567  | 7.6 (7.3, 8.0)                 | 26.7 (26.6, 26.8)                           |
| 45-49 years | 2019                                                     | 1,703  | 9.0 (8.6, 9.5)                 | 27.0 (26.9, 27.1)                           |
|             | 2020                                                     | 1,660  | 8.7 (8.3, 9.1)                 | 25.3 (25.1, 25.4)                           |
|             | 2021 (assuming Jul.-Dec. per 2019 baseline) <sup>1</sup> | 2,222  | 11.5 (11.0, 12.0)              | 23.5 (23.4, 23.7)                           |
|             | 2021 (assuming Jul.-Dec. per 2020) <sup>2</sup>          | 2,276  | 11.8 (11.3, 12.2)              | 22.7 (22.6, 22.8)                           |
| 50-54 years | 2019                                                     | 1,954  | 12.2 (11.7, 12.7)              | 23.1 (23.0, 23.2)                           |
|             | 2020                                                     | 2,205  | 13.4 (12.8, 13.9)              | 21.3 (21.1, 21.4)                           |
|             | 2021 (assuming Jul.-Dec. per 2019 baseline) <sup>1</sup> | 2,698  | 16.2 (15.6, 16.8)              | 19.8 (19.7, 19.9)                           |
|             | 2021 (assuming Jul.-Dec. per 2020) <sup>2</sup>          | 2,862  | 17.1 (16.5, 17.8)              | 18.9 (18.8, 19.0)                           |
| 55-59 years | 2019                                                     | 2,257  | 15.8 (15.1, 16.4)              | 19.4 (19.3, 19.5)                           |
|             | 2020                                                     | 2,681  | 18.2 (17.5, 18.9)              | 17.6 (17.5, 17.7)                           |
|             | 2021 (assuming Jul.-Dec. per 2019 baseline) <sup>1</sup> | 3,255  | 22.2 (21.4, 22.9)              | 16.2 (16.1, 16.3)                           |
|             | 2021 (assuming Jul.-Dec. per 2020) <sup>2</sup>          | 3,577  | 24.5 (23.7, 25.2)              | 15.3 (15.3, 15.4)                           |
| 60-64 years | 2019                                                     | 2,490  | 26.3 (25.2, 27.3)              | 15.8 (15.7, 15.9)                           |
|             | 2020                                                     | 3,246  | 33.2 (32.1, 34.4)              | 14.0 (13.9, 14.1)                           |
|             | 2021 (assuming Jul.-Dec. per 2019 baseline) <sup>1</sup> | 3,830  | 38.5 (37.3, 39.7)              | 12.9 (12.8, 13.0)                           |
|             | 2021 (assuming Jul.-Dec. per 2020) <sup>2</sup>          | 4,357  | 43.8 (42.6, 45.1)              | 12.0 (11.9, 12.1)                           |
| 65-69 years | 2019                                                     | 2,761  | 43.8 (42.3, 45.4)              | 12.7 (12.6, 12.8)                           |
|             | 2020                                                     | 3,459  | 53.2 (51.4, 54.9)              | 11.1 (11.0, 11.2)                           |
|             | 2021 (assuming Jul.-Dec. per 2019 baseline) <sup>1</sup> | 4,439  | 65.3 (63.4, 67.2)              | 10.1 (10.0, 10.2)                           |
|             | 2021 (assuming Jul.-Dec. per 2020) <sup>2</sup>          | 4,858  | 71.3 (69.3, 73.2)              | 9.4 (9.3, 9.5)                              |
| 70-74 years | 2019                                                     | 2,564  | 55.8 (53.7, 57.9)              | 10.2 (10.1, 10.3)                           |
|             | 2020                                                     | 3,705  | 78.0 (75.6, 80.5)              | 8.7 (8.6, 8.8)                              |

|             |                                                          |       |                      |                |
|-------------|----------------------------------------------------------|-------|----------------------|----------------|
|             | 2021 (assuming Jul.-Dec. per 2019 baseline) <sup>1</sup> | 4,439 | 88.4 (85.9, 90.9)    | 8.0 (7.9, 8.1) |
|             | 2021 (assuming Jul.-Dec. per 2020) <sup>2</sup>          | 5,346 | 103.8 (101.0, 106.5) | 7.3 (7.3, 7.4) |
| 75-79 years |                                                          |       |                      |                |
|             | 2019                                                     | 2,282 | 62.7 (60.2, 65.1)    | 7.7 (7.6, 7.8) |
|             | 2020                                                     | 2,876 | 76.2 (73.6, 78.8)    | 6.7 (6.6, 6.8) |
|             | 2021 (assuming Jul.-Dec. per 2019 baseline) <sup>1</sup> | 3,682 | 90.0 (87.2, 92.8)    | 6.1 (6.1, 6.2) |
|             | 2021 (assuming Jul.-Dec. per 2020) <sup>2</sup>          | 4,202 | 101.6 (98.5, 104.6)  | 5.7 (5.7, 5.8) |
| ≥80 years   |                                                          |       |                      |                |
|             | 2019                                                     | 4,432 | 218.6 (212.9, 224.3) | 4.6 (4.5, 4.7) |
|             | 2020                                                     | 5,716 | 269.2 (263.1, 275.1) | 3.7 (3.6, 3.8) |
|             | 2021 (assuming Jul.-Dec. per 2019 baseline) <sup>1</sup> | 7,796 | 307.7 (301.6, 313.8) | 3.3 (3.2, 3.3) |
|             | 2021 (assuming Jul.-Dec. per 2020) <sup>2</sup>          | 8,867 | 342.3 (336.1, 348.4) | 2.9 (2.9, 3.0) |

UI: Uncertainty interval. Estimated life year losses among individuals experiencing pandemic-associated mortality in 2020 and 2021 are presented in **Table S14**.

<sup>1</sup>Estimates apply mortality rates (scaled to 2021 population projections) from 2019 for the months of July to December.

<sup>2</sup>Estimates apply mortality rates (scaled to 2021 population projections) from 2020 for the months of July to December.

**Table S13: Annualized life tables for females in Chennai, 2016-2021.**

| Age group   | Year                                                     | Deaths | Mortality per 1000<br>(95% UI) | Life expectancy at entry<br>(95% CI), years |
|-------------|----------------------------------------------------------|--------|--------------------------------|---------------------------------------------|
| 0-4 years   | 2019                                                     | 194    | 1.3 (1.1, 1.5)                 | 73.6 (73.4, 73.8)                           |
|             | 2020                                                     | 160    | 1.1 (0.9, 1.2)                 | 72.5 (72.3, 72.6)                           |
|             | 2021 (assuming Jul.-Dec. per 2019 baseline) <sup>1</sup> | 192    | 1.2 (1.0, 1.4)                 | 70.0 (69.8, 70.1)                           |
|             | 2021 (assuming Jul.-Dec. per 2020) <sup>2</sup>          | 144    | 0.9 (0.8, 1.1)                 | 69.4 (69.3, 69.6)                           |
| 5-9 years   | 2019                                                     | 95     | 0.7 (0.6, 0.9)                 | 69.1 (68.9, 69.2)                           |
|             | 2020                                                     | 64     | 0.5 (0.4, 0.6)                 | 67.8 (67.7, 68.0)                           |
|             | 2021 (assuming Jul.-Dec. per 2019 baseline) <sup>1</sup> | 81     | 0.6 (0.5, 0.7)                 | 65.4 (65.2, 65.6)                           |
|             | 2021 (assuming Jul.-Dec. per 2020) <sup>2</sup>          | 75     | 0.6 (0.4, 0.7)                 | 64.7 (64.6, 64.9)                           |
| 10-14 years | 2019                                                     | 83     | 0.6 (0.5, 0.7)                 | 64.3 (64.2, 64.5)                           |
|             | 2020                                                     | 62     | 0.5 (0.3, 0.6)                 | 63.0 (62.8, 63.2)                           |
|             | 2021 (assuming Jul.-Dec. per 2019 baseline) <sup>1</sup> | 82     | 0.6 (0.5, 0.7)                 | 60.6 (60.4, 60.7)                           |
|             | 2021 (assuming Jul.-Dec. per 2020) <sup>2</sup>          | 74     | 0.5 (0.4, 0.7)                 | 59.9 (59.8, 60.0)                           |
| 15-19 years | 2019                                                     | 122    | 0.7 (0.6, 0.9)                 | 59.5 (59.3, 59.7)                           |
|             | 2020                                                     | 121    | 0.7 (0.6, 0.9)                 | 58.1 (58.0, 58.3)                           |
|             | 2021 (assuming Jul.-Dec. per 2019 baseline) <sup>1</sup> | 131    | 0.8 (0.7, 0.9)                 | 55.7 (55.6, 55.9)                           |
|             | 2021 (assuming Jul.-Dec. per 2020) <sup>2</sup>          | 141    | 0.9 (0.7, 1.0)                 | 55.0 (54.9, 55.2)                           |
| 20-24 years | 2019                                                     | 183    | 0.9 (0.8, 1.0)                 | 54.7 (54.6, 54.9)                           |
|             | 2020                                                     | 147    | 0.7 (0.6, 0.8)                 | 53.4 (53.2, 53.5)                           |
|             | 2021 (assuming Jul.-Dec. per 2019 baseline) <sup>1</sup> | 180    | 0.9 (0.7, 1.0)                 | 51.0 (50.8, 51.1)                           |
|             | 2021 (assuming Jul.-Dec. per 2020) <sup>2</sup>          | 170    | 0.8 (0.7, 0.9)                 | 50.3 (50.1, 50.4)                           |
| 25-29 years | 2019                                                     | 213    | 0.9 (0.8, 1.0)                 | 49.9 (49.8, 50.1)                           |
|             | 2020                                                     | 218    | 0.9 (0.8, 1.0)                 | 48.5 (48.4, 48.7)                           |
|             | 2021 (assuming Jul.-Dec. per 2019 baseline) <sup>1</sup> | 243    | 1.0 (0.9, 1.1)                 | 46.2 (46.0, 46.3)                           |
|             | 2021 (assuming Jul.-Dec. per 2020) <sup>2</sup>          | 259    | 1.1 (1.0, 1.2)                 | 45.5 (45.3, 45.6)                           |
| 30-34 years | 2019                                                     | 218    | 1.0 (0.9, 1.1)                 | 45.2 (45.0, 45.3)                           |
|             | 2020                                                     | 214    | 1.0 (0.9, 1.1)                 | 43.7 (43.6, 43.9)                           |
|             | 2021 (assuming Jul.-Dec. per 2019 baseline) <sup>1</sup> | 287    | 1.3 (1.1, 1.4)                 | 41.4 (41.2, 41.5)                           |
|             | 2021 (assuming Jul.-Dec. per 2020) <sup>2</sup>          | 271    | 1.2 (1.1, 1.4)                 | 40.7 (40.6, 40.8)                           |
| 35-39 years | 2019                                                     | 331    | 1.6 (1.4, 1.8)                 | 40.4 (40.2, 40.5)                           |
|             | 2020                                                     | 348    | 1.7 (1.5, 1.8)                 | 38.9 (38.8, 39.1)                           |
|             | 2021 (assuming Jul.-Dec. per 2019 baseline) <sup>1</sup> | 455    | 2.2 (2.0, 2.4)                 | 36.6 (36.5, 36.8)                           |
|             | 2021 (assuming Jul.-Dec. per 2020) <sup>2</sup>          | 451    | 2.1 (1.9, 2.3)                 | 35.9 (35.8, 36.1)                           |
| 40-44 years | 2019                                                     | 414    | 2.1 (1.9, 2.4)                 | 35.7 (35.5, 35.8)                           |
|             | 2020                                                     | 505    | 2.6 (2.4, 2.8)                 | 34.2 (34.1, 34.4)                           |
|             | 2021 (assuming Jul.-Dec. per 2019 baseline) <sup>1</sup> | 684    | 3.5 (3.2, 3.7)                 | 32.0 (31.9, 32.1)                           |
|             | 2021 (assuming Jul.-Dec. per 2020) <sup>2</sup>          | 726    | 3.7 (3.4, 3.9)                 | 31.3 (31.2, 31.4)                           |
| 45-49 years | 2019                                                     | 697    | 3.7 (3.5, 4.0)                 | 31.0 (30.9, 31.2)                           |
|             | 2020                                                     | 814    | 4.3 (4.0, 4.6)                 | 29.7 (29.5, 29.8)                           |
|             | 2021 (assuming Jul.-Dec. per 2019 baseline) <sup>1</sup> | 1,065  | 5.6 (5.3, 5.9)                 | 27.5 (27.4, 27.7)                           |
|             | 2021 (assuming Jul.-Dec. per 2020) <sup>2</sup>          | 1,118  | 5.9 (5.5, 6.2)                 | 26.8 (26.7, 26.9)                           |
| 50-54 years | 2019                                                     | 884    | 5.4 (5.1, 5.8)                 | 26.6 (26.4, 26.7)                           |
|             | 2020                                                     | 1,072  | 6.4 (6.0, 6.8)                 | 25.3 (25.1, 25.4)                           |
|             | 2021 (assuming Jul.-Dec. per 2019 baseline) <sup>1</sup> | 1,375  | 8.2 (7.8, 8.6)                 | 23.2 (23.1, 23.4)                           |
|             | 2021 (assuming Jul.-Dec. per 2020) <sup>2</sup>          | 1,493  | 8.9 (8.5, 9.4)                 | 22.5 (22.4, 22.7)                           |
| 55-59 years | 2019                                                     | 1,314  | 10.0 (9.5, 10.6)               | 22.2 (22.1, 22.4)                           |
|             | 2020                                                     | 1,568  | 11.6 (11.1, 12.2)              | 21.0 (20.9, 21.1)                           |
|             | 2021 (assuming Jul.-Dec. per 2019 baseline) <sup>1</sup> | 2,243  | 16.3 (15.6, 17.0)              | 19.1 (19.0, 19.2)                           |
|             | 2021 (assuming Jul.-Dec. per 2020) <sup>2</sup>          | 2,397  | 17.4 (16.8, 18.1)              | 18.5 (18.3, 18.6)                           |
| 60-64 years | 2019                                                     | 1,610  | 17.2 (16.4, 18.1)              | 18.2 (18.1, 18.4)                           |
|             | 2020                                                     | 2,014  | 20.9 (20.0, 21.8)              | 17.1 (17.0, 17.2)                           |
|             | 2021 (assuming Jul.-Dec. per 2019 baseline) <sup>1</sup> | 2,659  | 27.2 (26.2, 28.3)              | 15.5 (15.4, 15.6)                           |
|             | 2021 (assuming Jul.-Dec. per 2020) <sup>2</sup>          | 2,877  | 29.5 (28.5, 30.6)              | 14.9 (14.8, 15.0)                           |
| 65-69 years | 2019                                                     | 2,053  | 30.1 (28.9, 31.4)              | 14.7 (14.5, 14.8)                           |
|             | 2020                                                     | 2,434  | 34.5 (33.2, 35.9)              | 13.7 (13.6, 13.8)                           |
|             | 2021 (assuming Jul.-Dec. per 2019 baseline) <sup>1</sup> | 3,102  | 44.2 (42.7, 45.7)              | 12.4 (12.3, 12.5)                           |
|             | 2021 (assuming Jul.-Dec. per 2020) <sup>2</sup>          | 3,294  | 47.1 (45.5, 48.6)              | 11.9 (11.8, 12.0)                           |
| 70-74 years | 2019                                                     | 2,243  | 41.4 (39.7, 43.1)              | 11.7 (11.5, 11.8)                           |
|             | 2020                                                     | 2,988  | 53.4 (51.5, 55.2)              | 10.8 (10.7, 11.0)                           |

|             |                                                          |       |                      |                 |
|-------------|----------------------------------------------------------|-------|----------------------|-----------------|
|             | 2021 (assuming Jul.-Dec. per 2019 baseline) <sup>1</sup> | 3,457 | 62.6 (60.6, 64.5)    | 9.9 (9.8, 10.0) |
|             | 2021 (assuming Jul.-Dec. per 2020) <sup>2</sup>          | 3,866 | 70.5 (68.4, 72.6)    | 9.4 (9.3, 9.5)  |
| 75-79 years |                                                          |       |                      |                 |
|             | 2019                                                     | 2,215 | 52.2 (50.0, 54.3)    | 8.8 (8.6, 8.9)  |
|             | 2020                                                     | 2,592 | 59.0 (56.8, 61.2)    | 8.4 (8.3, 8.5)  |
|             | 2021 (assuming Jul.-Dec. per 2019 baseline) <sup>1</sup> | 2,971 | 68.4 (66.1, 70.8)    | 7.6 (7.5, 7.7)  |
|             | 2021 (assuming Jul.-Dec. per 2020) <sup>2</sup>          | 3,190 | 73.8 (71.4, 76.2)    | 7.4 (7.3, 7.5)  |
| ≥80 years   |                                                          |       |                      |                 |
|             | 2019                                                     | 5,476 | 177.1 (172.9, 181.3) | 5.6 (5.5, 5.8)  |
|             | 2020                                                     | 5,961 | 183.9 (179.7, 188.1) | 5.4 (5.3, 5.6)  |
|             | 2021 (assuming Jul.-Dec. per 2019 baseline) <sup>1</sup> | 6,520 | 212.1 (207.8, 216.6) | 4.7 (4.6, 4.8)  |
|             | 2021 (assuming Jul.-Dec. per 2020) <sup>2</sup>          | 6,706 | 218.9 (214.5, 223.4) | 4.6 (4.5, 4.7)  |

UI: Uncertainty interval. Estimated life year losses among individuals experiencing pandemic-associated mortality in 2020 and 2021 are presented in **Table S14**.

<sup>1</sup>Estimates apply mortality rates (scaled to 2021 population projections) from 2019 for the months of July to December.

<sup>2</sup>Estimates apply mortality rates (scaled to 2021 population projections) from 2020 for the months of July to December.

**Table S14: Mean life years lost among individuals experiencing pandemic-associated mortality in 2020 and 2021, relative to life expectancy in 2019.**

| <b>Sex</b> | <b>Year</b> | <b>Mean life years lost (95% UI)</b> |
|------------|-------------|--------------------------------------|
| Both sexes |             |                                      |
|            | 2020        | 14.0 (13.8, 14.2)                    |
|            | 2021        | 16.2 (16.0, 16.3)                    |
| Males      |             |                                      |
|            | 2020        | 12.7 (12.5, 13.0)                    |
|            | 2021        | 15.5 (15.3, 15.6)                    |
| Females    |             |                                      |
|            | 2020        | 15.8 (15.5, 16.2)                    |
|            | 2021        | 17.1 (16.9, 17.4)                    |

UI: Uncertainty interval. Life tables underlying life expectancy estimates are presented in **Table S12** and **Table S13** for males and females, respectively. We obtained estimates of the average years of life lost among individuals who died in association with the COVID-19 pandemic by taking a weighted average of estimated years of life remaining for each age group during 2019, with weights defined by the representation of each age group among all excess fatalities during 2020 and 2021. While this approach provides a general assessment of years of life lost due to COVID-19, it should be noted that estimates may overstate life years lost of individuals who died due to COVID-19 experienced other comorbid conditions which could lead to shorter baseline life expectancy.

**Table S15: Unadjusted associations of excess mortality with community socioeconomic attributes.**

| Category                       | Measurement                                        | Percent change in excess mortality (95% UI), per 1-standard deviation increase in covariate |                                                        |                                             |                                              |
|--------------------------------|----------------------------------------------------|---------------------------------------------------------------------------------------------|--------------------------------------------------------|---------------------------------------------|----------------------------------------------|
|                                |                                                    | <u>Total period</u><br>March, 2020 to<br>June, 2021                                         | <u>Early lockdown</u><br>24 March to 20 April,<br>2020 | <u>First wave</u><br>May to August,<br>2020 | <u>Second wave</u><br>March to June,<br>2021 |
| Population density             | Household crowding                                 | 2.8 (2.0, 3.6)                                                                              | -7.8 (-9.5, -5.9)                                      | 1.0 (0.0, 2.1)                              | 6.3 (5.1, 7.7)                               |
|                                | Population density                                 | 1.3 (0.7, 2.0)                                                                              | -5.2 (-6.6, -3.5)                                      | -0.8 (-1.7, 0.1)                            | 3.7 (2.7, 4.8)                               |
| Housing quality                | Non-permanent housing structures                   | 1.0 (0.4, 1.6)                                                                              | -7.9 (-9.3, -6.5)                                      | -1.5 (-2.3, -0.7)                           | 4.5 (3.5, 5.4)                               |
|                                | Dilapidated or unlivable dwelling structures       | 1.6 (0.9, 2.3)                                                                              | -3.6 (-5.3, -1.9)                                      | 0.4 (-0.5, 1.4)                             | 4.1 (3.2, 5.3)                               |
|                                | Households with unfinished flooring                | 0.7 (0.2, 1.2)                                                                              | -5.4 (-6.6, -4.3)                                      | -1.3 (-2.0, -0.7)                           | 2.8 (2.1, 3.5)                               |
| Water, sanitation, and hygiene | Households lacking on-site water                   | 2.3 (1.7, 2.9)                                                                              | -6.5 (-8.0, -5.2)                                      | -1.5 (-2.3, -0.7)                           | 7.0 (6.0, 7.9)                               |
|                                | Households practicing open defecation              | 0.9 (0.3, 1.5)                                                                              | -6.9 (-8.3, -5.5)                                      | -0.9 (-1.7, -0.1)                           | 3.6 (2.7, 4.5)                               |
|                                | Households lacking on-site latrines                | 2.5 (1.8, 3.1)                                                                              | -7.5 (-8.9, -6.0)                                      | -0.1 (-0.9, 0.8)                            | 6.4 (5.4, 7.3)                               |
| Fuel and energy                | Households lacking electric lighting               | 1.8 (1.2, 2.4)                                                                              | -4.9 (-6.3, -3.6)                                      | -1.5 (-2.3, -0.3)                           | 5.3 (4.5, 6.2)                               |
|                                | Households reliant on solid cooking fuels          | 1.0 (0.5, 1.4)                                                                              | -5.4 (-6.5, -4.3)                                      | -1.9 (-2.6, -1.3)                           | 3.7 (3.1, 4.5)                               |
| Wealth and marginalization     | Population belonging to scheduled castes or tribes | 2.4 (1.8, 3.1)                                                                              | -7.6 (-9.1, -6.1)                                      | 0.3 (-0.5, 1.3)                             | 6.3 (5.3, 7.4)                               |
|                                | Households lacking bank accounts                   | 1.8 (1.1, 2.4)                                                                              | -8.6 (-10.0, -7.2)                                     | -1.2 (-2.1, -0.4)                           | 5.7 (4.7, 6.6)                               |
|                                | Households lacking key index assets                | 1.1 (0.6, 1.6)                                                                              | -4.5 (-5.7, -3.3)                                      | -0.2 (-0.9, 0.5)                            | 3.1 (2.4, 3.9)                               |

Estimates are obtained based on regression models fit across draws from the distribution of excess mortality measures. Values are corrected for lagged reporting of deaths based on 2019 observations (**Figure S2**). We present numerical estimates for predictors of excess deaths among individuals aged  $\geq 50$  years in **Table S16**. Deaths are aggregated by PIN code areas; analyses include PIN code areas for which  $\geq 1000$  deaths were registered over the study period. Measures of excess mortality by PIN code area are plotted in **Figure S7**.

**Table S16: Unadjusted associations of excess mortality with community socioeconomic attributes among individuals aged 50 years and older.**

| Category                       | Measurement                                        | Percent change in excess mortality (95% UI), per 1-standard deviation increase in covariate |                                                 |                                      |                                       |
|--------------------------------|----------------------------------------------------|---------------------------------------------------------------------------------------------|-------------------------------------------------|--------------------------------------|---------------------------------------|
|                                |                                                    | Total period<br>March, 2020 to<br>June, 2021                                                | Early lockdown<br>24 March to 20 April,<br>2020 | First wave<br>May to August,<br>2020 | Second wave<br>March to June,<br>2021 |
| Population density             | Household crowding                                 | 2.3 (1.5, 3.1)                                                                              | -9.4 (-11.0, -7.7)                              | 0.2 (-0.9, 1.2)                      | 6.0 (4.9, 7.3)                        |
|                                | Population density                                 | 2.5 (1.8, 3.3)                                                                              | -3.8 (-5.4, -1.7)                               | -0.1 (-1.1, 1.0)                     | 4.9 (3.8, 6.0)                        |
| Housing quality                | Non-permanent housing structures                   | 1.8 (1.1, 2.5)                                                                              | -6.9 (-8.3, -5.3)                               | -1.4 (-2.3, -0.4)                    | 5.6 (4.6, 6.6)                        |
|                                | Dilapidated or unlivable dwelling structures       | 2.6 (1.8, 3.4)                                                                              | -2.9 (-4.6, -0.8)                               | 1.1 (0.1, 2.3)                       | 5.3 (4.1, 6.4)                        |
|                                | Households with unfinished flooring                | 0.8 (0.3, 1.3)                                                                              | -6.1 (-7.3, -4.9)                               | -1.5 (-2.2, -0.8)                    | 3.4 (2.7, 4.2)                        |
|                                | Households lacking on-site water                   | 2.6 (2.0, 3.3)                                                                              | -6.2 (-7.6, -4.6)                               | -1.8 (-2.7, -1.0)                    | 7.7 (6.8, 8.7)                        |
| Water, sanitation, and hygiene | Households practicing open defecation              | 1.5 (0.9, 2.2)                                                                              | -6.0 (-7.5, -4.4)                               | -0.7 (-1.6, 0.2)                     | 4.6 (3.6, 5.5)                        |
|                                | Households lacking on-site latrines                | 2.6 (2.0, 3.4)                                                                              | -7.9 (-9.4, -6.3)                               | -0.3 (-1.2, 0.6)                     | 6.9 (5.9, 8.0)                        |
| Fuel and energy                | Households lacking electric lighting               | 2.3 (1.7, 3.0)                                                                              | -4.7 (-6.1, -3.1)                               | -1.6 (-2.4, -0.7)                    | 6.1 (5.2, 7.1)                        |
|                                | Households reliant on solid cooking fuels          | 1.0 (0.5, 1.6)                                                                              | -6.3 (-7.4, -5.0)                               | -2.2 (-2.9, -1.5)                    | 4.4 (3.7, 5.2)                        |
| Wealth and marginalization     | Population belonging to scheduled castes or tribes | 2.1 (1.5, 2.8)                                                                              | -7.4 (-8.9, -5.9)                               | -0.1 (-0.9, 0.8)                     | 6.5 (5.5, 7.5)                        |
|                                | Households lacking bank accounts                   | 1.9 (1.3, 2.6)                                                                              | -8.8 (-10.2, -7.2)                              | -1.7 (-2.6, -0.9)                    | 6.2 (5.3, 7.2)                        |
|                                | Households lacking key index assets                | 0.9 (0.4, 1.5)                                                                              | -4.6 (-5.9, -3.2)                               | -0.5 (-1.2, 0.3)                     | 3.3 (2.5, 4.0)                        |
|                                |                                                    |                                                                                             |                                                 |                                      |                                       |

Estimates are obtained based on regression models fit across draws from the distribution of excess mortality measures. Values are corrected for lagged reporting of deaths based on 2019 observations (**Figure S2**). Deaths are aggregated by PIN code areas; analyses include PIN code areas for which  $\geq 1000$  deaths were registered over the study period. Measures of excess mortality by PIN code area are plotted in **Figure S7**.

**Table S17: Principal component analysis of community socioeconomic attributes.**

| Predictor                                   | Spearman correlation |       |       |       |       |       |       |        |        |        |        |        |        |
|---------------------------------------------|----------------------|-------|-------|-------|-------|-------|-------|--------|--------|--------|--------|--------|--------|
|                                             | PC1                  | PC2   | PC3   | PC4   | PC5   | PC6   | PC7   | PC8    | PC9    | PC10   | PC11   | PC12   | PC13   |
| Household crowding                          | 0.34                 | 0.52  | -0.31 | 0.44  | -0.17 | 0.30  | -0.23 | 0.09   | -0.14  | -0.01  | 0.01   | -0.35  | -0.02  |
| Population density                          | 0.97                 | -0.25 | -0.04 | -0.01 | -0.02 | 0.00  | -0.01 | 0.00   | 0.00   | 0.00   | 0.00   | 0.00   | 0.00   |
| Nonpermanent dwellings (%)                  | 0.90                 | 0.30  | 0.08  | 0.10  | 0.06  | -0.15 | 0.12  | 0.22   | 0.01   | -0.01  | 0.00   | 0.00   | 0.00   |
| Dilapidated or unlivable dwellings (%)      | 0.81                 | -0.03 | -0.26 | 0.29  | 0.35  | 0.11  | 0.21  | -0.03  | -0.01  | 0.00   | 0.00   | 0.00   | 0.00   |
| Unfinished flooring (%)                     | 0.78                 | 0.20  | 0.43  | -0.15 | -0.32 | 0.05  | 0.10  | -0.01  | -0.16  | -0.08  | -0.03  | 0.00   | 0.00   |
| Lacking on-site water (%)                   | 0.73                 | 0.61  | -0.20 | -0.23 | 0.03  | 0.00  | 0.01  | 0.00   | 0.00   | 0.00   | 0.00   | 0.00   | 0.00   |
| Practicing open defecation (%)              | 0.89                 | 0.27  | 0.32  | 0.04  | 0.08  | -0.15 | 0.02  | -0.03  | 0.00   | 0.00   | 0.00   | 0.00   | 0.00   |
| Lacking on-site latrines (%)                | 0.87                 | 0.38  | 0.24  | 0.07  | 0.09  | 0.14  | -0.09 | 0.02   | 0.00   | 0.00   | 0.00   | 0.00   | 0.00   |
| Lacking electric lighting (%)               | 0.87                 | 0.17  | 0.10  | -0.02 | -0.14 | 0.20  | 0.13  | -0.08  | 0.23   | -0.25  | -0.06  | 0.00   | 0.00   |
| Using solid cooking fuels (%)               | 0.78                 | 0.24  | 0.36  | -0.09 | -0.36 | 0.14  | 0.22  | -0.01  | 0.02   | 0.03   | 0.00   | 0.00   | 0.00   |
| Scheduled castes/tribes (%)                 | 0.39                 | 0.58  | 0.02  | 0.03  | 0.01  | 0.24  | -0.17 | 0.16   | -0.21  | -0.13  | -0.02  | -0.14  | 0.56   |
| Lacking bank accounts (%)                   | 0.65                 | 0.59  | -0.24 | 0.37  | -0.19 | -0.04 | -0.04 | -0.01  | 0.00   | 0.00   | 0.00   | 0.00   | 0.00   |
| Lacking key index assets (%)                | 0.73                 | 0.44  | 0.28  | -0.02 | -0.24 | 0.01  | 0.08  | -0.04  | -0.05  | -0.29  | 0.21   | 0.00   | 0.00   |
| Proportion of variance explained            | 0.807                | 0.124 | 0.029 | 0.018 | 0.011 | 0.005 | 0.004 | 0.001  | <0.001 | <0.001 | <0.001 | <0.001 | <0.001 |
| Cumulative proportion of variance explained | 0.807                | 0.932 | 0.961 | 0.979 | 0.990 | 0.995 | 0.999 | >0.999 | >0.999 | >0.999 | >0.999 | >0.999 | >0.999 |

Values indicate measures of Spearman correlation ( $\rho$ ) for each community socioeconomic variable and the indicated principal component. The bottom two rows indicate the proportion of variance explained by each principal component, individually and cumulatively; the consistent associations of principal component 1 (PC1) and PC2 with measures of community disadvantage motivated consideration of these two variables as independent measures of relative disadvantage for the primary analyses presented in **Figure 3**. Numerical estimates of the association of each principal component variable with the outcome of relative mortality, at the PIN code level, are presented in **Table S18** (for all individuals) and **Table S19** (for individuals aged  $\geq 50$  years).



**Table S18: Unadjusted and adjusted associations of excess mortality with principal component variables.**

| Measure | Percent change in excess mortality (95% UI), per 1-standard deviation increase in covariate |                   |                                             |                   |                                  |                   |                                   |                   |
|---------|---------------------------------------------------------------------------------------------|-------------------|---------------------------------------------|-------------------|----------------------------------|-------------------|-----------------------------------|-------------------|
|         | Total period                                                                                |                   | Early lockdown (24 March to 20 April, 2020) |                   | First wave (May to August, 2020) |                   | Second wave (March to June, 2021) |                   |
|         | Unadjusted                                                                                  | Adjusted          | Unadjusted                                  | Adjusted          | Unadjusted                       | Adjusted          | Unadjusted                        | Adjusted          |
| PC1     | 1.7 (1.0, 2.3)                                                                              | 1.7 (1.0, 2.3)    | -6.2 (-7.6, -4.7)                           | -6.2 (-7.6, -4.7) | -0.9 (-1.7, 0.0)                 | -0.9 (-1.7, 0.0)  | 4.7 (3.8, 5.7)                    | 4.7 (3.8, 5.7)    |
| PC2     | 1.3 (0.6, 1.9)                                                                              | 1.3 (0.6, 1.9)    | -5.0 (-6.7, -3.4)                           | -5.0 (-6.7, -3.4) | -0.8 (-1.7, 0.0)                 | -0.8 (-1.7, 0.0)  | 4.4 (3.3, 5.4)                    | 4.4 (3.3, 5.4)    |
| PC3     | -1.1 (-1.6, -0.5)                                                                           | -1.1 (-1.6, -0.5) | -0.3 (-1.8, 1.1)                            | -0.3 (-1.8, 1.1)  | 0.6 (-0.2, 1.4)                  | 0.6 (-0.2, 1.4)   | -2.5 (-3.4, -1.6)                 | -2.5 (-3.4, -1.6) |
| PC4     | -0.3 (-0.8, 0.2)                                                                            | -0.3 (-0.8, 0.2)  | -3.5 (-4.8, -2.2)                           | -3.5 (-4.8, -2.2) | 1.4 (0.7, 2.1)                   | 1.4 (0.7, 2.1)    | -1.1 (-1.8, -0.3)                 | -1.1 (-1.8, -0.3) |
| PC5     | 0.7 (0.1, 1.2)                                                                              | 0.7 (0.1, 1.2)    | 2.5 (1.1, 4.0)                              | 2.5 (1.1, 4.0)    | 2.9 (2.1, 3.6)                   | 2.9 (2.1, 3.6)    | 0.8 (0.0, 1.6)                    | 0.8 (0.0, 1.6)    |
| PC6     | 3.7 (2.7, 4.7)                                                                              | 3.7 (2.7, 4.7)    | 2.0 (-0.3, 4.5)                             | 2.0 (-0.3, 4.5)   | 2.4 (1.2, 3.8)                   | 2.4 (1.2, 3.8)    | 5.7 (4.2, 7.4)                    | 5.7 (4.2, 7.4)    |
| PC7     | -2.5 (-3.2, -1.8)                                                                           | -2.5 (-3.2, -1.8) | 4.9 (3.0, 6.7)                              | 4.9 (3.0, 6.7)    | -2.0 (-3.0, -1.1)                | -2.0 (-3.0, -1.1) | -3.2 (-4.3, -2.3)                 | -3.2 (-4.3, -2.3) |
| PC8     | 0.2 (-0.3, 0.8)                                                                             | 0.2 (-0.3, 0.8)   | -4.9 (-6.2, -3.5)                           | -4.9 (-6.2, -3.5) | -1.0 (-1.8, -0.3)                | -1.0 (-1.8, -0.3) | 1.7 (0.9, 2.5)                    | 1.7 (0.9, 2.5)    |
| PC9     | 0.4 (-0.2, 0.9)                                                                             | 0.4 (-0.2, 0.9)   | -0.5 (-2.0, 0.9)                            | -0.5 (-2.0, 0.9)  | -2.8 (-3.6, -2.0)                | -2.8 (-3.6, -2.0) | 2.3 (1.5, 3.2)                    | 2.3 (1.5, 3.2)    |
| PC10    | 0.2 (-0.3, 0.7)                                                                             | 0.2 (-0.3, 0.7)   | -2.8 (-4.1, -1.5)                           | -2.8 (-4.1, -1.5) | -1.3 (-2.0, -0.6)                | -1.3 (-2.0, -0.6) | 1.6 (0.9, 2.3)                    | 1.6 (0.9, 2.3)    |
| PC11    | 0.4 (-0.2, 1.0)                                                                             | 0.4 (-0.2, 1.0)   | 7.1 (5.6, 8.8)                              | 7.1 (5.6, 8.8)    | 4.5 (3.7, 5.4)                   | 4.5 (3.7, 5.4)    | -2.0 (-2.8, -1.2)                 | -2.0 (-2.8, -1.2) |
| PC12    | 0.5 (0.0, 1.0)                                                                              | 0.5 (0.0, 1.0)    | 2.2 (0.8, 3.6)                              | 2.2 (0.8, 3.6)    | -0.7 (-1.4, 0.1)                 | -0.7 (-1.4, 0.1)  | 0.1 (-0.6, 1.0)                   | 0.1 (-0.6, 1.0)   |
| PC13    | -0.2 (-0.7, 0.4)                                                                            | -0.2 (-0.7, 0.4)  | -2.2 (-3.6, -0.8)                           | -2.2 (-3.6, -0.8) | -0.7 (-1.4, 0.0)                 | -0.7 (-1.4, 0.0)  | 0.7 (-0.1, 1.5)                   | 0.7 (-0.1, 1.5)   |

Estimates are obtained based on regression models fit across draws from the distribution of excess mortality measures; unadjusted estimates correspond to models including each principal component as a single explanatory variable, while adjusted estimates control for all principal components (the absence of correlation among principal components accounts for similarity in adjusted and unadjusted estimates). Values are corrected for lagged reporting of deaths based on 2019 observations (**Figure S2**). We present corresponding estimates for models fitted to data from individuals aged  $\geq 50$  years in **Table S19**. Deaths are aggregated by PIN code areas; analyses include PIN code areas for which  $\geq 1000$  deaths were registered over the study period. Measures of excess mortality by PIN code area are plotted in **Figure S7**.

**Table S19: Unadjusted and adjusted associations of excess mortality with principal component variables among individuals aged 50 years and older.**

| Measure | Percent change in excess mortality (95% UI), per 1-standard deviation increase in covariate |                   |                                             |                   |                                  |                   |                                   |                   |
|---------|---------------------------------------------------------------------------------------------|-------------------|---------------------------------------------|-------------------|----------------------------------|-------------------|-----------------------------------|-------------------|
|         | Total period                                                                                |                   | Early lockdown (24 March to 20 April, 2020) |                   | First wave (May to August, 2020) |                   | Second wave (March to June, 2021) |                   |
|         | Unadjusted                                                                                  | Adjusted          | Unadjusted                                  | Adjusted          | Unadjusted                       | Adjusted          | Unadjusted                        | Adjusted          |
| PC1     | 2.6 (2.0, 3.4)                                                                              | 2.6 (2.0, 3.4)    | -5.2 (-6.7, -3.3)                           | -5.2 (-6.7, -3.3) | -0.4 (-1.4, 0.6)                 | -0.4 (-1.4, 0.6)  | 5.9 (4.9, 7.0)                    | 5.9 (4.9, 7.0)    |
| PC2     | 0.4 (-0.3, 1.0)                                                                             | 0.4 (-0.3, 1.0)   | -6.4 (-8.2, -4.6)                           | -6.4 (-8.2, -4.6) | -2.0 (-3.0, -1.1)                | -2.0 (-3.0, -1.1) | 4.0 (2.9, 5.1)                    | 4.0 (2.9, 5.1)    |
| PC3     | -1.7 (-2.3, -1.1)                                                                           | -1.7 (-2.3, -1.1) | -1.6 (-3.2, 0.0)                            | -1.6 (-3.2, 0.0)  | 0.4 (-0.5, 1.2)                  | 0.4 (-0.5, 1.2)   | -2.9 (-3.8, -2.0)                 | -2.9 (-3.8, -2.0) |
| PC4     | -0.6 (-1.1, 0.0)                                                                            | -0.6 (-1.1, 0.0)  | -4.3 (-5.6, -2.9)                           | -4.3 (-5.6, -2.9) | 1.3 (0.5, 2.1)                   | 1.3 (0.5, 2.1)    | -1.2 (-2.1, -0.3)                 | -1.2 (-2.1, -0.3) |
| PC5     | 1.1 (0.5, 1.6)                                                                              | 1.1 (0.5, 1.6)    | 3.4 (1.9, 4.9)                              | 3.4 (1.9, 4.9)    | 3.6 (2.7, 4.4)                   | 3.6 (2.7, 4.4)    | 0.9 (0.0, 1.7)                    | 0.9 (0.0, 1.7)    |
| PC6     | 2.5 (1.7, 3.4)                                                                              | 2.5 (1.7, 3.4)    | -2.6 (-4.6, -0.2)                           | -2.6 (-4.6, -0.2) | 1.5 (0.3, 2.8)                   | 1.5 (0.3, 2.8)    | 4.6 (3.3, 6.1)                    | 4.6 (3.3, 6.1)    |
| PC7     | -2.2 (-2.9, -1.5)                                                                           | -2.2 (-2.9, -1.5) | 4.6 (2.7, 6.4)                              | 4.6 (2.7, 6.4)    | -1.6 (-2.5, -0.6)                | -1.6 (-2.5, -0.6) | -2.5 (-3.5, -1.5)                 | -2.5 (-3.5, -1.5) |
| PC8     | 0.4 (-0.2, 1.0)                                                                             | 0.4 (-0.2, 1.0)   | -4.5 (-5.9, -3.1)                           | -4.5 (-5.9, -3.1) | -1.3 (-2.1, -0.5)                | -1.3 (-2.1, -0.5) | 1.8 (1.0, 2.7)                    | 1.8 (1.0, 2.7)    |
| PC9     | 0.9 (0.3, 1.5)                                                                              | 0.9 (0.3, 1.5)    | 1.9 (0.2, 3.5)                              | 1.9 (0.2, 3.5)    | -2.8 (-3.6, -2.0)                | -2.8 (-3.6, -2.0) | 2.6 (1.7, 3.6)                    | 2.6 (1.7, 3.6)    |
| PC10    | 0.5 (-0.1, 1.0)                                                                             | 0.5 (-0.1, 1.0)   | -3.8 (-5.0, -2.4)                           | -3.8 (-5.0, -2.4) | -1.4 (-2.1, -0.6)                | -1.4 (-2.1, -0.6) | 2.1 (1.3, 2.9)                    | 2.1 (1.3, 2.9)    |
| PC11    | -0.2 (-0.8, 0.4)                                                                            | -0.2 (-0.8, 0.4)  | 8.2 (6.3, 9.9)                              | 8.2 (6.3, 9.9)    | 4.9 (3.9, 5.8)                   | 4.9 (3.9, 5.8)    | -3.4 (-4.3, -2.5)                 | -3.4 (-4.3, -2.5) |
| PC12    | 0.3 (-0.3, 0.8)                                                                             | 0.3 (-0.3, 0.8)   | 1.0 (-0.5, 2.5)                             | 1.0 (-0.5, 2.5)   | -1.0 (-1.8, -0.2)                | -1.0 (-1.8, -0.2) | 0.0 (-0.8, 0.8)                   | 0.0 (-0.8, 0.8)   |
| PC13    | 0.3 (-0.3, 0.8)                                                                             | 0.3 (-0.3, 0.8)   | 1.2 (-0.3, 2.6)                             | 1.2 (-0.3, 2.6)   | 0.0 (-0.8, 0.8)                  | 0.0 (-0.8, 0.8)   | 1.4 (0.6, 2.3)                    | 1.4 (0.6, 2.3)    |

Estimates are obtained based on regression models fit across draws from the distribution of excess mortality measures; unadjusted estimates correspond to models including each principal component as a single explanatory variable, while adjusted estimates control for all principal components (the absence of correlation among principal components accounts for similarity in adjusted and unadjusted estimates). Values are corrected for lagged reporting of deaths based on 2019 observations (**Figure S2**). Deaths are aggregated by PIN code areas; analyses include PIN code areas for which  $\geq 1000$  deaths were registered over the study period. Measures of excess mortality by PIN code area are plotted in **Figure S7**.

### A. Reported COVID-19 cases

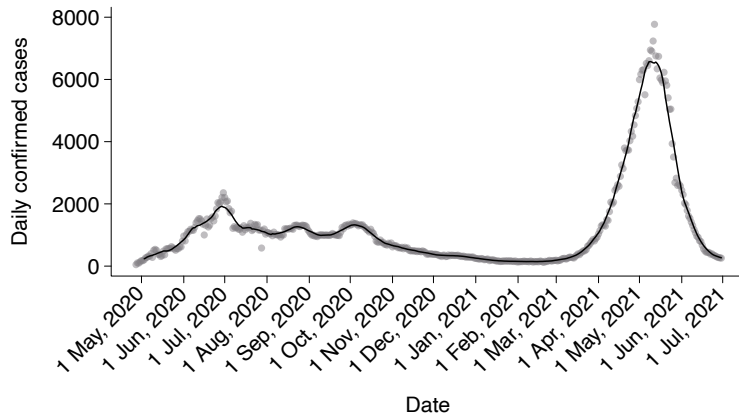

### B. Reported COVID-19 deaths

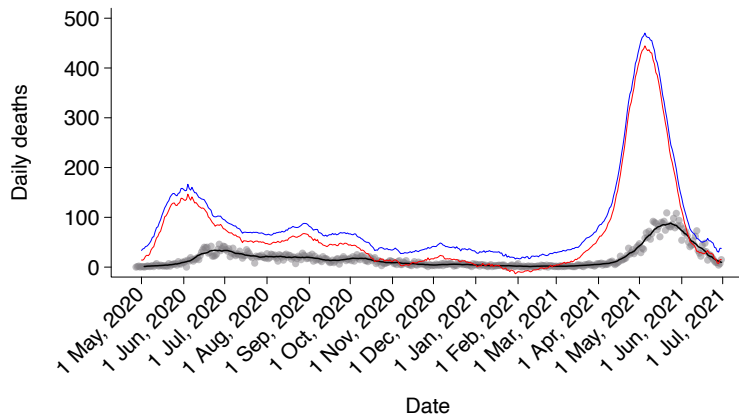

**Figure S1: Reported COVID-19 cases and deaths in Chennai.** We illustrate 14-day moving average rates of new daily confirmed (**A**) COVID-19 cases and (**B**) reported deaths (black lines); points illustrate daily reported values without averaging. Blue and red lines in the second panel denote the estimated number of excess deaths (two-week moving average), by date of death, based on models fitted with and without corrections for changes in mortality reporting following the 2019 redistricting, respectively.

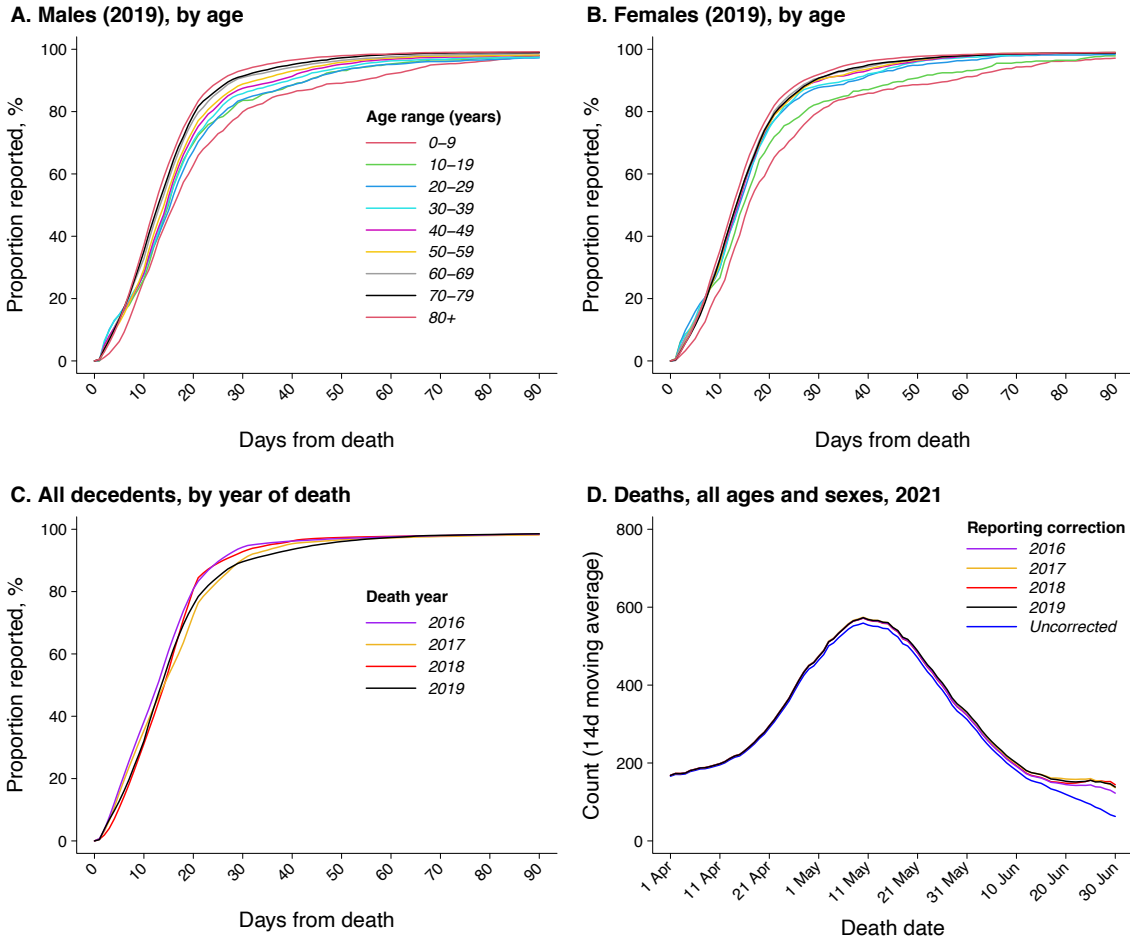

**Figure S2: Lagged reporting of cases and deaths in the Civil Registration System, 2016-19.** We illustrate the cumulative proportion of deaths reported, by days from individuals' death date, for (A) males and (B) females, separately by age, for the year 2019. Below, we illustrate (C) the cumulative proportion of deaths reported, by days from individuals' death date, for each calendar year (2016-19) before the COVID-19 pandemic. Last, we illustrate (D) the 14-day moving average of deaths for the period of 1 April to 30 June, 2021, applying corrections based on the reporting lags observed from 2016-19.

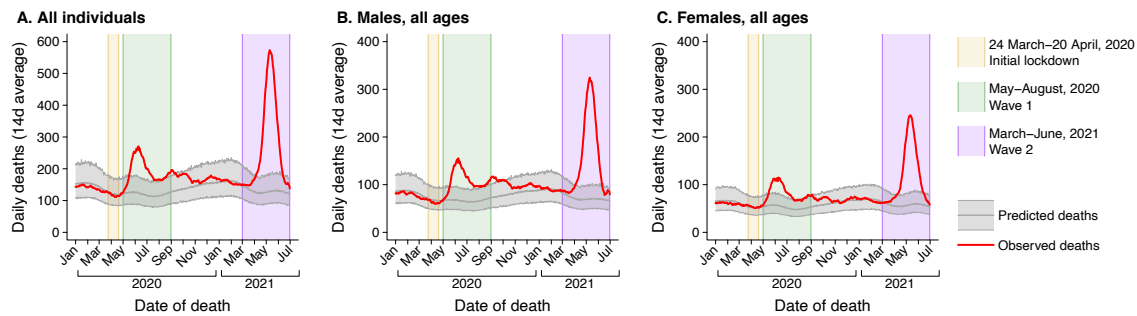

**Figure S3: Excess mortality during the COVID-19 pandemic in Chennai, for models without secular reporting changes after redistricting.** We plot 14-day moving average estimates of daily mortality in 2020 and 2021 (red), corrected for lagged reporting based on 2019 observations (**Figure S2**). Gray lines and shaded areas illustrate model-based expectations of the 14-day moving average, according to pre-pandemic observations, together with 95% uncertainty intervals. Corresponding estimates of excess deaths are presented in **Table S7**, **Table S8**, and **Table S9**.

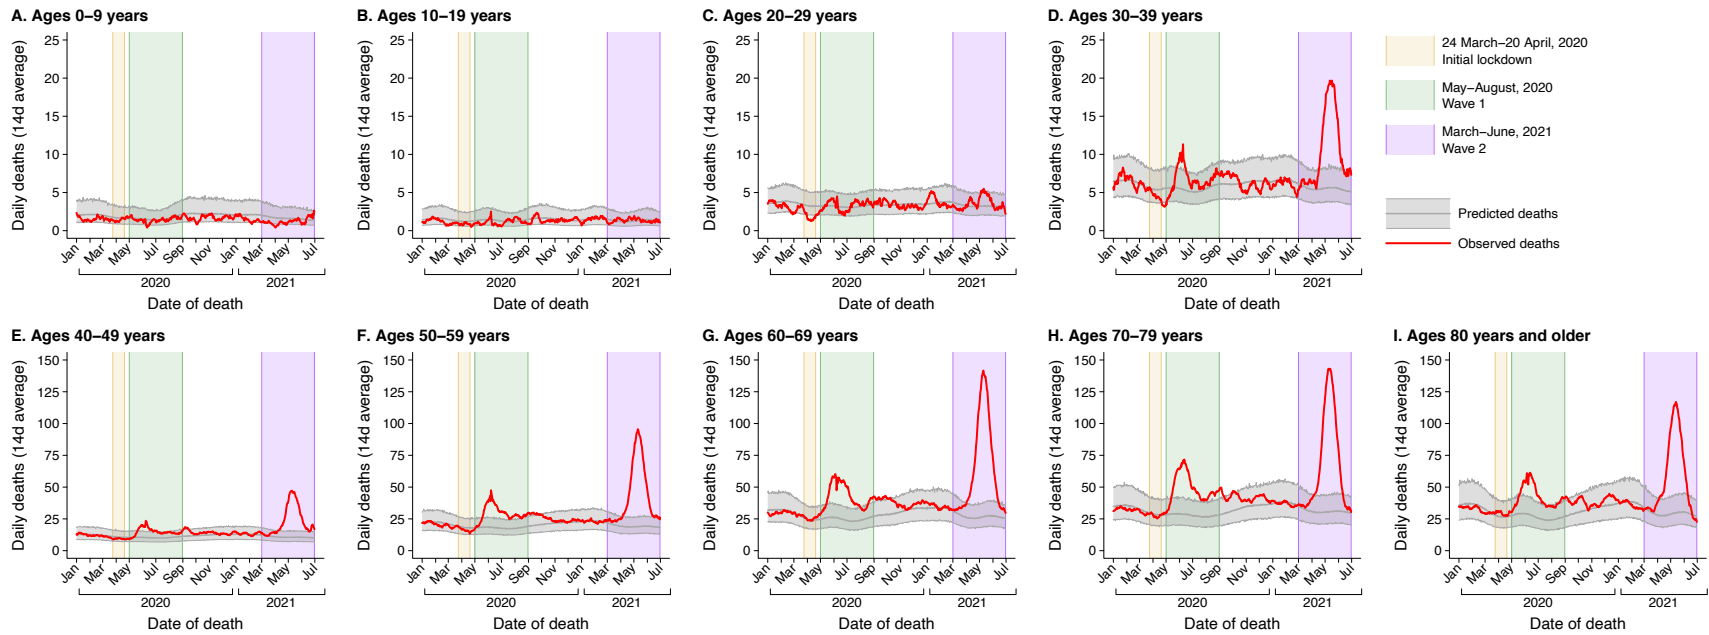

**Figure S4: Age-specific excess mortality during the COVID-19 pandemic in Chennai, for models without secular reporting changes after redistricting.** We plot 14-day moving average estimates of daily mortality in 2020 and 2021 by age (red), corrected for lagged reporting based on 2019 observations (**Figure S2**). Gray lines and shaded areas illustrate model-based expectations of the 14-day moving average, according to pre-pandemic observations, with 95% uncertainty. Corresponding estimates of excess deaths are presented in **Table S7**, **Table S8**, and **Table S9**.

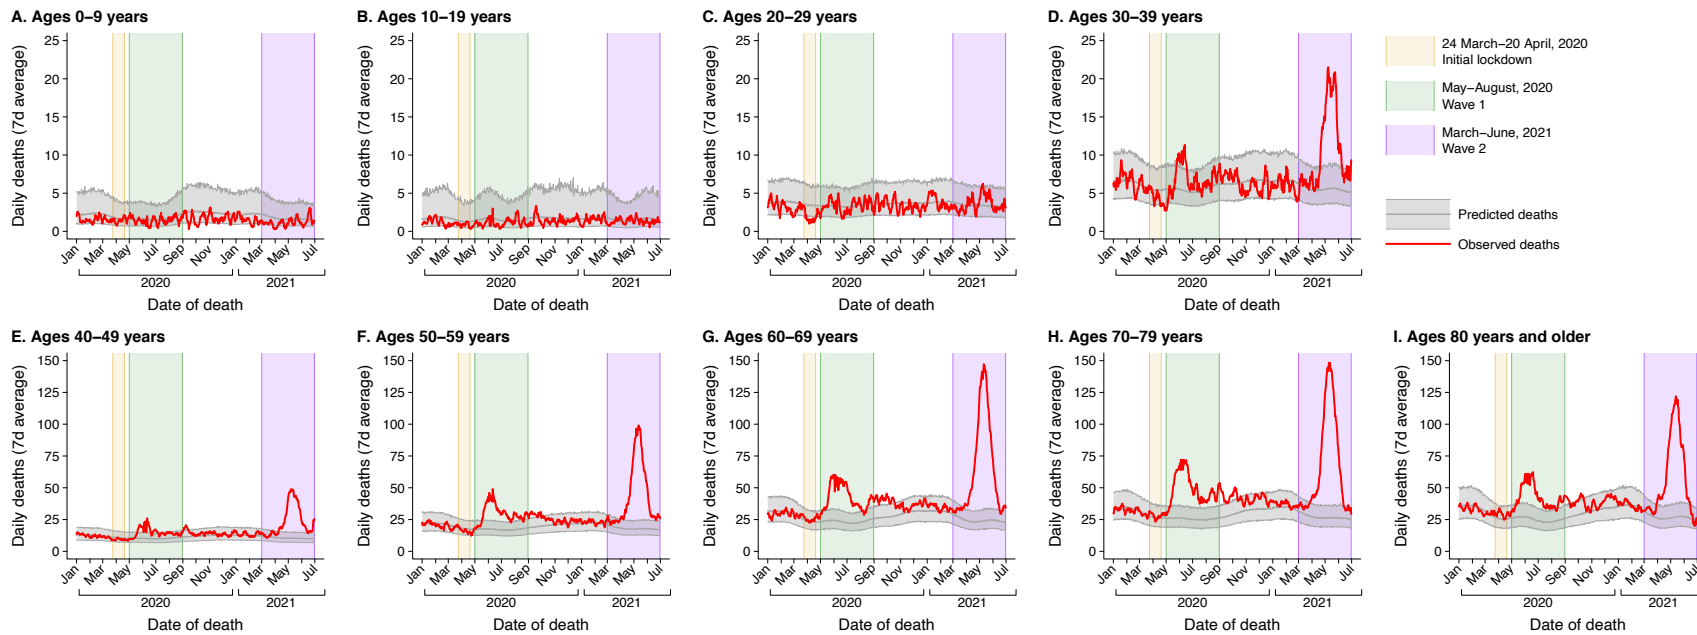

**Figure S5: Age-specific excess mortality during the COVID-19 pandemic in Chennai, for models fitted to 7-day moving average time series.** We plot 7-day moving average estimates of daily mortality in 2020 and 2021 by age (red), corrected for lagged reporting based on 2019 observations (**Figure S2**). Gray lines and shaded areas illustrate model-based expectations of the 7-day moving average, according to pre-pandemic observations, with 95% uncertainty. Corresponding estimates of excess deaths are presented in **Table S10**.

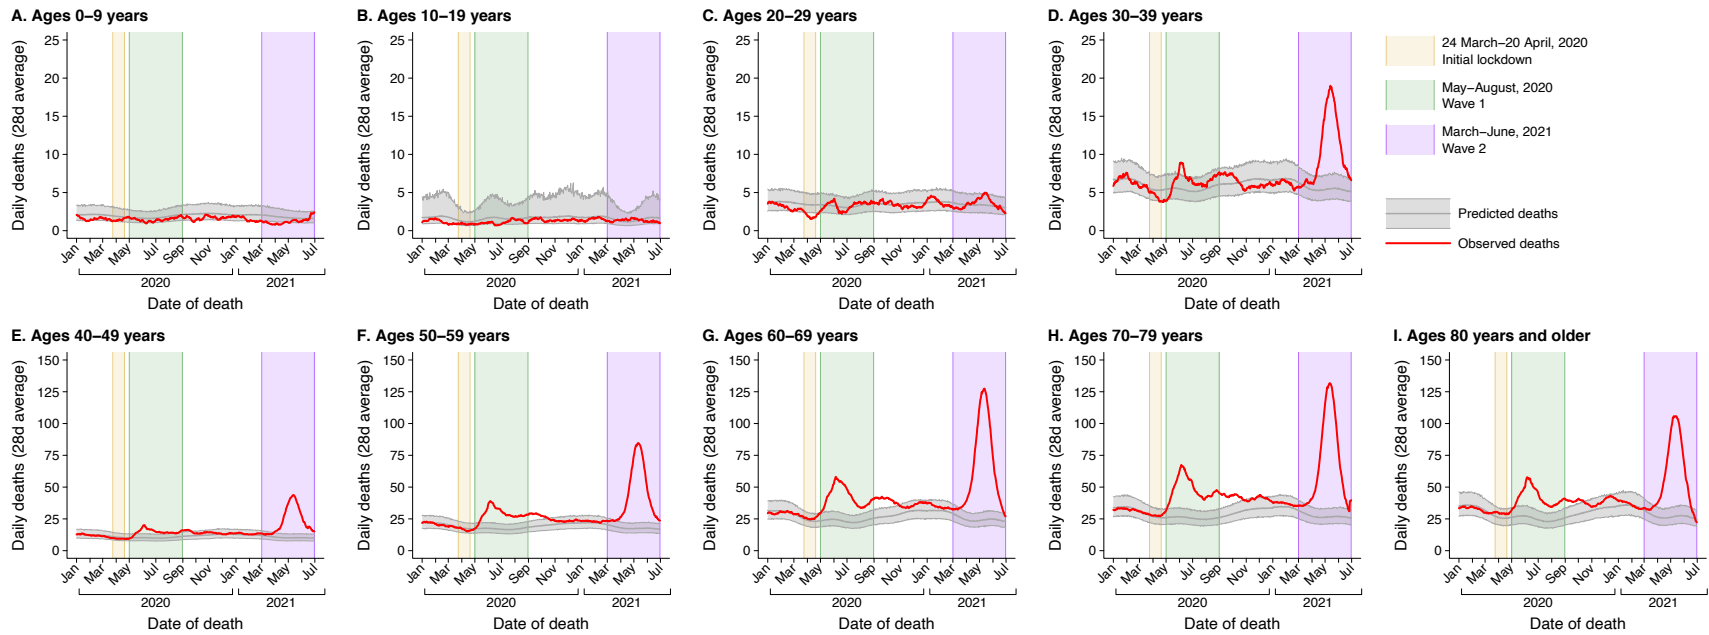

**Figure S6: Age-specific excess mortality during the COVID-19 pandemic in Chennai, for models fitted to 28-day moving average time series.** We plot 28-day moving average estimates of daily mortality in 2020 and 2021 by age (red), corrected for lagged reporting based on 2019 observations (**Figure S2**). Gray lines and shaded areas illustrate model-based expectations of the 28-day moving average, according to pre-pandemic observations, with 95% uncertainty. Corresponding estimates of excess deaths are presented in **Table S11**.



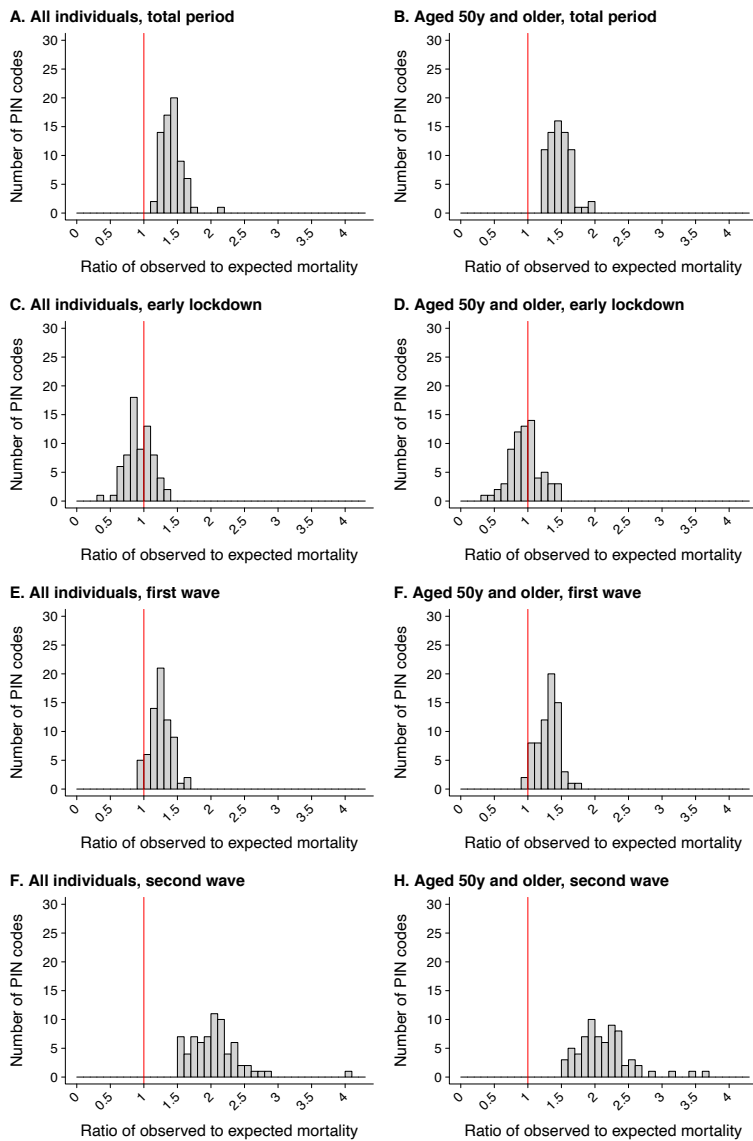

**Figure S7: Distribution of observed to expected mortality across PIN code areas.** We illustrate the distribution of the ratio of observed to expected mortality for all individuals and for individuals aged  $\geq 50$  years, during **(A-B)** the total pandemic period (March, 2020 to June, 2021); **(C-D)** the first four weeks of the country-wide lockdown (24 March to 20 April, 2020); **(E-F)** the first wave (May-August, 2020); and **(G-H)** the second wave (March-June, 2021). Associations of PIN code area characteristics with excess mortality estimates are presented in **Figure 3**, **Table S15**, and **Table S16**, while estimates of associations with principal components of the community socioeconomic attributes are presented in **Table S18** and **Table S19**.

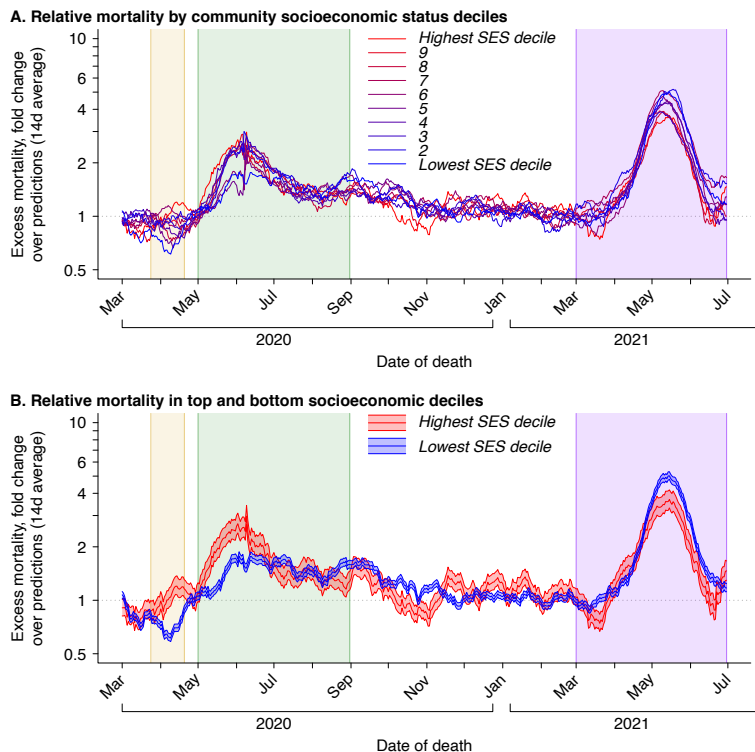

**Figure S8: Relative mortality during the COVID-19 pandemic according to community socioeconomic status (SES) decile.** We illustrate estimates of relative mortality (defined as observed over predicted deaths, calculated as a 14-day moving average) for PIN code areas grouped according to socioeconomic status decile, as measured by values of the first principal component derived across all 13 socioeconomic status measures (**Figure 3; Table S17**). The top panel (**A**) illustrates median estimates of relative mortality, calculated against trends projected from pre-pandemic observations, with a color gradient from blue (lowest-socioeconomic status decile) to red (highest socioeconomic status decile). The bottom panel (**B**) illustrates the highest and lowest deciles with accompanying 95% uncertainty intervals (shaded areas).
